# Supplementary material for: Widely targeted metabolome profiling of different plateau raspberries and berry parts provides innovative insight into their antioxidant activities
Source: Front Plant Sci. 2023 Mar 13;14:1143439. doi: 10.3389/fpls.2023.1143439 (PMC10042140; doi:10.3389/fpls.2023.1143439)
Supplement: Supplementary file 5 [file Table_4.xlsx]

## Sheet: Sheet1
Supplementary Table S4 Special metabolites in seeds of Qinghai raspberry
Index	Q1 (Da)	Q3 (Da)	Molecular weight (Da)	Formula	Ionization model	Compounds	Class I	Class II	CAS	Level	Y-RS-1	Y-RS-2	Y-RS-3	Y-RP-1	Y-RP-2	Y-RP-3	Y-R-1	Y-R-2	Y-R-3	Q-RS-1	Q-RS-2	Q-RS-3	Q-RP-1	Q-RP-2	Q-RP-3	Q-R-1	Q-R-2	Q-R-3	QC01	QC02	QC03	cpd_ID	kegg_map
Jmwn002494	325.09	119.05	326.1	C15H18O8	[M-H]-	(2E)-3-[4-(β-D-glucopyranoside)-phenylacrylic]-acid	Phenolic acids	Phenolic acids	-	1	9	9	9	9	9	9	9	9	9	273560	223398	217461	9	9	9	9	9	9	252939	197878	232049	-	-
Lmfn001337	635.09	169.01	636.096	C27H24O18	[M-H]-	1,2,3-Tri-O-galloyl-β-D-glucose	Phenolic acids	Phenolic acids	-	1	9	9	9	9	9	9	9	9	9	431655	472443	479371	9	9	9	9	9	9	501236	433285	438545	-	-
Lmsn003088	635.09	169.01	636.096	C27H24O18	[M-H]-	1,4,6-Tri-O-galloyl-β-D-glucose	Phenolic acids	Phenolic acids	94513-58-3	2	9	9	9	9	9	9	9	9	9	403302	427922	492861	9	9	9	9	9	9	399167	345130	400443	-	-
Wmhn001495	483.08	169.01	484.085	C20H20O14	[M-H]-	1,4-Di-O-Galloyl-D-glucose	Phenolic acids	Phenolic acids	-	2	9	9	9	9	9	9	9	9	9	1.00936e+06	979662	1.18898e+06	9	9	9	9	9	9	969807	811840	894966	-	-
Lmsn004714	629.11	169.01	630.122	C29H26O16	[M-H]-	1,6-Di-O-galloyl-2-O-p-coumaroyl-β-D-glucose	Phenolic acids	Phenolic acids	115713-49-0	3	9	9	9	9	9	9	9	9	9	11220.3	21753.5	20171.8	9	9	9	9	9	9	14480.2	20691.5	20727	-	-
Lmsn003778	493.1	169.01	494.106	C22H22O13	[M-H]-	1-O-Caffeoyl-4-O-galloyl-β-D-glucose	Phenolic acids	Phenolic acids	-	2	9	9	9	9	9	9	9	9	9	40703.5	32650	36078.4	9	9	9	9	9	9	43121.7	26183.6	35215.5	-	-
Hmbp003234	255.09	163.03	254.079	C12H14O6	[M+H]+	1-O-Caffeoylglycerol	Phenolic acids	Phenolic acids	-	2	9	9	9	9	9	9	9	9	9	36445.8	50837	63731.6	9	9	9	9	9	9	49200.7	43306.3	46353.2	-	-
Lmsn004323	507.11	169.01	508.122	C23H24O13	[M-H]-	1-O-Galloyl-2-O-Feruloyl-β-D-glucose	Phenolic acids	Phenolic acids	-	3	9	9	9	9	9	9	9	9	9	30104.6	22916.8	21394.8	9	9	9	9	9	9	28863.5	15911.6	21337.7	-	-
Lmsn004090	477.1	169.01	478.111	C22H22O12	[M-H]-	1-O-Galloyl-3-O-p-Coumaroyl-β-D-glucose	Phenolic acids	Phenolic acids	-	2	9	9	9	9	9	9	9	9	9	33257.2	31835.9	35654.4	9	9	9	9	9	9	38111.3	30928.4	37519.8	-	-
Lmsn003582	477.1	169.01	478.111	C22H22O12	[M-H]-	1-O-Galloyl-4-O-p-Coumaroyl-β-D-glucose	Phenolic acids	Phenolic acids	-	2	9	9	9	9	9	9	9	9	9	20574.6	50326.6	38091.4	9	9	9	9	9	9	32150.7	34570.3	36326.3	-	-
Lmsn003409	477.1	169.01	478.111	C22H22O12	[M-H]-	1-O-Galloyl-6-O-p-Coumaroyl-β-D-glucose	Phenolic acids	Phenolic acids	-	3	9	9	9	9	9	9	9	9	9	24384.1	37905.1	19206.6	9	9	9	9	9	9	24581.9	20757.7	21258.3	-	-
MWSmce490	167.04	123.05	168.042	C8H8O4	[M-H]-	2',4',6'-Trihydroxyacetophenone	Phenolic acids	Phenolic acids	480-66-0	3	9	9	9	9	9	9	9	9	9	33091.9	31198.2	46372.4	9	9	9	9	9	9	17337.3	28502.5	26706.6	C21895	-
Lmfn001062	635.09	169.01	636.096	C27H24O18	[M-H]-	2,4,6-Tri-O-galloyl-D-glucose	Phenolic acids	Phenolic acids	108043-99-8	1	9	9	9	9	9	9	9	9	9	425674	383931	443787	9	9	9	9	9	9	446494	397596	440690	-	-
MWSmce653	149.06	106.04	150.068	C9H10O2	[M-H]-	2'-Hydroxy-4'-Methylacetophenone	Phenolic acids	Phenolic acids	6921-64-8	3	9	9	9	9	9	9	9	9	9	18958	20735.5	29935.1	9	9	9	9	9	9	15550.5	19195.1	17579.2	-	-
Lmmn001643	163.04	119.05	164.047	C9H8O3	[M-H]-	2-Hydroxycinnamic acid	Phenolic acids	Phenolic acids	583-17-5	2	9	9	9	9	9	9	9	9	9	5.10882e+06	5.15591e+06	5.22288e+06	9	9	9	9	9	9	4.22352e+06	4.45115e+06	3.89535e+06	C01772	ko00360,ko00999,ko01100,ko01110
Lmxp001668	151.08	91.05	150.068	C9H10O2	[M+H]+	2-Methoxy-4-ethenylphenol	Phenolic acids	Phenolic acids	7786-61-0	3	9	9	9	9	9	9	9	9	9	80912.3	110700	106791	9	9	9	9	9	9	111042	106027	100552	C17883	-
MWS1875	143.05	115.05	144.058	C10H8O	[M-H]-	2-Naphthol	Phenolic acids	Phenolic acids	135-19-3	2	9	9	9	9	9	9	9	9	9	19133.7	20804	20160.2	9	9	9	9	9	9	16872.5	18483.3	17544.6	C11713	-
Lmhn102068	295.05	179.03	296.053	C13H12O8	[M-H]-	2-O-Caffeoylmalic acid	Phenolic acids	Phenolic acids	53755-04-7	3	9	9	9	9	9	9	9	9	9	244809	249232	311856	9	9	9	9	9	9	269431	219582	231218	-	-
Wafn002491	385.08	209.03	386.085	C16H18O11	[M-H]-	2-O-Feruloylglucaric Acid	Phenolic acids	Phenolic acids	-	2	9	9	9	9	9	9	9	9	9	14925.7	25407.2	36897.2	9	9	9	9	9	9	16769.9	22849.4	25038.9	-	-
Hmln000873	331.07	169.01	332.074	C13H16O10	[M-H]-	2-O-Galloyl-D-glucose	Phenolic acids	Phenolic acids	-	2	9	9	9	9	9	9	9	9	9	1.6722e+06	1.79559e+06	1.65847e+06	9	9	9	9	9	9	1.47687e+06	1.32174e+06	1.41212e+06	-	-
MWS1850	139.08	56.96	138.068	C8H10O2	[M+H]+	2-Phenoxyethanol	Phenolic acids	Phenolic acids	122-99-6	3	9	9	9	9	9	9	9	9	9	13581	26003.5	27202.6	9	9	9	9	9	9	28629.6	24469.2	28668.4	-	-
Lmgp002593	123.04	77.04	122.037	C7H6O2	[M+H]+	3-hydroxybenzaldehyde	Phenolic acids	Phenolic acids	100-83-4	3	9	9	9	9	9	9	9	9	9	994184	751623	875223	9	9	9	9	9	9	683375	706490	741494	C03067	-
MWSmce248	163.04	119.05	164.047	C9H8O3	[M-H]-	3-Hydroxycinnamic Acid	Phenolic acids	Phenolic acids	14755-02-3	2	9	9	9	9	9	9	9	9	9	5.10882e+06	5.15591e+06	5.22288e+06	9	9	9	9	9	9	4.22352e+06	4.45115e+06	3.89535e+06	C12621	ko00360,ko01100
Wabn003563	385.11	179.07	386.121	C17H22O10	[M-H]-	3'-O-Beta-D-Glucopyranosyl plumbagic acid	Phenolic acids	Phenolic acids	-	2	9	9	9	9	9	9	9	9	9	96713.2	81842.7	75250.2	9	9	9	9	9	9	111130	64939	79178.4	-	-
Hmln000659	331.07	169.01	332.074	C13H16O10	[M-H]-	3-O-Galloyl-D-glucose	Phenolic acids	Phenolic acids	-	2	9	9	9	9	9	9	9	9	9	887779	592974	658300	9	9	9	9	9	9	1.36098e+06	1.00641e+06	885549	-	-
pmn001421	337.09	191.06	338.1	C16H18O8	[M-H]-	3-O-p-Coumaroylquinic acid	Phenolic acids	Phenolic acids	87099-71-6	3	9	9	9	9	9	9	9	9	9	233182	195034	261357	9	9	9	9	9	9	230177	172808	227289	-	-
Lmyn003835	289.04	137.02	290.043	C14H10O7	[M-H]-	4-(3,4,5-Trihydroxybenzoxy)benzoic acid	Phenolic acids	Phenolic acids	-	2	9	9	9	9	9	9	9	9	9	7.00752e+06	6.30078e+06	6.96341e+06	9	9	9	9	9	9	7.42136e+06	5.51736e+06	7.01764e+06	-	-
Lmsn000842	481.06	301	482.07	C20H18O14	[M-H]-	4,6-(S)-Hexahydroxydiphenoyl-β-D-glucose	Phenolic acids	Phenolic acids	36378-48-0	2	9	9	9	9	9	9	9	9	9	2.26078e+06	1.81132e+06	1.80967e+06	9	9	9	9	9	9	1.62736e+06	1.44143e+06	1.44237e+06	-	-
mws1336	138.06	120.04	137.048	C7H7NO2	[M+H]+	4-Aminobenzoic acid	Phenolic acids	Phenolic acids	150-13-0	2	9	9	9	9	9	9	9	9	9	823403	758386	871585	9	9	9	9	9	9	767266	778862	757041	C00568	ko00790,ko01100,ko01240
Zaln004057	335.08	179.03	336.085	C16H16O8	[M-H]-	4-caffeoylshikimic acid	Phenolic acids	Phenolic acids	-	1	9	9	9	9	9	9	9	9	9	1.80493e+06	2.10168e+06	1.60268e+06	9	9	9	9	9	9	1.82126e+06	1.5509e+06	2.17185e+06	-	-
Hmqp002567	284.13	147.04	283.121	C17H17NO3	[M+H]+	4-Hydroxycinnamic acid p-hydroxyphenethylamine	Phenolic acids	Phenolic acids	-	3	9	9	9	9	9	9	9	9	9	8593.94	12600.5	15204.7	9	9	9	9	9	9	12913.9	10366.9	14063.4	-	-
mws0182	151.04	107.05	152.047	C8H8O3	[M-H]-	4-Hydroxyphenylacetic acid	Phenolic acids	Phenolic acids	156-38-7	3	9	9	9	9	9	9	9	9	9	22597.3	20108.2	21140.5	9	9	9	9	9	9	30141	14010.3	26326.6	C00642	ko00350,ko00360,ko01100
Zmhn000892	301.09	139.05	302.1	C13H18O8	[M-H]-	4-O-Glucosyl-3,4-dihydroxybenzyl alcohol	Phenolic acids	Phenolic acids	-	2	9	9	9	9	9	9	9	9	9	348547	355025	334115	9	9	9	9	9	9	290524	283307	283257	-	-
HJN037	183.03	124.02	184.037	C8H8O5	[M-H]-	4-O-Methylgallic Acid	Phenolic acids	Phenolic acids	4319-02-2	3	9	9	9	9	9	9	9	9	9	1.02322e+06	1.16586e+06	1.28577e+06	9	9	9	9	9	9	1.23554e+06	1.08355e+06	1.23253e+06	-	-
pma6460	337.09	163.04	338.1	C16H18O8	[M-H]-	4-O-p-Coumaroylquinic acid	Phenolic acids	Phenolic acids	32451-86-8	3	9	9	9	9	9	9	9	9	9	17905	14162.2	3962.52	9	9	9	9	9	9	11348.2	9999.64	11091.4	C10441	-
Hmhn003518	355.1	175.04	356.111	C16H20O9	[M-H]-	4-O-β-D-glucopyranosylferulic acid	Phenolic acids	Phenolic acids	-	1	9	9	9	9	9	9	9	9	9	352989	706761	826729	9	9	9	9	9	9	447369	673735	659224	-	-
MWS1877	205.16	133.06	206.167	C14H22O	[M-H]-	4-tert-Octylphenol	Phenolic acids	Phenolic acids	140-66-9	1	9	9	9	9	9	9	9	9	9	15011	15255.1	8906.51	9	9	9	9	9	9	12070.7	10795.3	12853.1	C14205	-
pmn001516	325.06	125.02	326.064	C14H14O9	[M-H]-	5-Galloylshikimic acid	Phenolic acids	Phenolic acids	95719-51-0	1	9	9	9	9	9	9	9	9	9	377408	398352	429614	9	9	9	9	9	9	328460	343479	304071	-	-
Zmhn001703	331.07	169.02	332.074	C13H16O10	[M-H]-	5-O-Galloyl-D-hamamelose	Phenolic acids	Phenolic acids	-	2	9	9	9	9	9	9	9	9	9	1.49506e+06	1.26149e+06	1.05135e+06	9	9	9	9	9	9	1.96075e+06	1.45811e+06	1.46555e+06	-	-
Zmhn002334	355.1	193.05	356.111	C16H20O9	[M-H]-	6-O-Feruloyl-β-D-glucose	Phenolic acids	Phenolic acids	137887-25-3	2	9	9	9	9	9	9	9	9	9	91835.3	143050	138596	9	9	9	9	9	9	107000	90567.6	143593	-	-
Lmfn000604	331.07	169.01	332.074	C13H16O10	[M-H]-	6-O-Galloyl-β-D-glucose	Phenolic acids	Phenolic acids	13186-19-1	1	9	9	9	9	9	9	9	9	9	1.701e+06	1.27991e+06	1.11037e+06	9	9	9	9	9	9	1.91192e+06	1.53986e+06	1.41156e+06	-	-
Zmxn004029	585.23	195.07	586.241	C31H38O11	[M-H]-	7,8-Dihydro-Buddlenol B(erythro)	Phenolic acids	Phenolic acids	-	2	9	9	9	9	9	9	9	9	9	51133.6	54156.8	63846.6	9	9	9	9	9	9	41502.9	42902.2	49330.5	-	-
Lmqp002761	313.14	151.08	312.136	C19H20O4	[M+H]+	Alnusonol	Phenolic acids	Phenolic acids	52330-12-8	3	9	9	9	9	9	9	9	9	9	59662	59498.7	47276	9	9	9	9	9	9	102337	65016.5	66557.7	-	-
Qaxp004683	519.17	177.06	518.164	C22H30O14	[M+H]+	Arillatose B	Phenolic acids	Phenolic acids	137941-45-8	3	9	9	9	9	9	9	9	9	9	45210.5	20477.8	20075.7	9	9	9	9	9	9	16931.7	30140.7	23706	-	-
Lhdp112405	391.28	149.02	390.277	C24H38O4	[M+H]+	Bis(2-ethylhexyl)phthalate	Phenolic acids	Phenolic acids	117-81-7	1	9	9	9	9	9	9	9	9	9	41940.6	104548	108071	9	9	9	9	9	9	40297.6	93118.5	101769	C03690	-
MWSmce341	279.16	149.03	278.152	C16H22O4	[M+H]+	Butyl isobutyl phthalate	Phenolic acids	Phenolic acids	17851-53-5	3	9	9	9	9	9	9	9	9	9	1.53469e+07	1.5333e+07	1.61371e+07	9	9	9	9	9	9	1.66477e+07	1.60284e+07	1.48789e+07	-	-
MWS0550	133.06	55.02	132.058	C9H8O	[M+H]+	Cinnamaldehyde	Phenolic acids	Phenolic acids	14371-10-9	3	9	9	9	9	9	9	9	9	9	62489.6	56918.9	85696.4	9	9	9	9	9	9	69301.2	62740.3	73252.5	C00903	ko00940,ko01100,ko01110
Lmgp003989	499.13	163.04	498.116	C25H22O11	[M+H]+	Dicaffeoylshikimic acid	Phenolic acids	Phenolic acids	-	3	9	9	9	9	9	9	9	9	9	21617.7	25430.8	14099.1	9	9	9	9	9	9	29789.5	37273.4	34067.3	-	-
Wafn002081	285.06	153.02	286.069	C12H14O8	[M-H]-	Dihydroxybenzoyl xyloside	Phenolic acids	Phenolic acids	-	1	9	9	9	9	9	9	9	9	9	204238	208582	204079	9	9	9	9	9	9	203646	175706	172544	-	-
Lmmp010562	391.28	149.02	390.277	C24H38O4	[M+H]+	Diisooctyl Phthalate	Phenolic acids	Phenolic acids	27554-26-3	1	9	9	9	9	9	9	9	9	9	213152	508067	481474	9	9	9	9	9	9	267131	471954	446190	C14577	-
MWSslk097	195.06	163.04	194.058	C10H10O4	[M+H]+	Dimethyl phthalate	Phenolic acids	Phenolic acids	131-11-3	2	9	9	9	9	9	9	9	9	9	86669.1	81938.3	80271.6	9	9	9	9	9	9	70754.1	67054.8	59896.1	C11233	-
Cmzn005970	433.11	271.06	434.121	C21H22O10	[M-H]-	Dunalianoside A	Phenolic acids	Phenolic acids	-	2	9	9	9	9	9	9	9	9	9	516046	581942	637496	9	9	9	9	9	9	462156	499208	493526	-	-
Wmmp000182	301	301	302.006	C14H6O8	[M-H]-	ellagicacid	Phenolic acids	Phenolic acids	-	2	9	9	9	9	9	9	9	9	9	2.4968e+06	2.32231e+06	2.68798e+06	9	9	9	9	9	9	2.00854e+06	2.39526e+06	2.49826e+06	-	-
Jmbp006554	389.12	359.07	388.116	C20H20O8	[M+H]+	Ethyl Rosmarinate	Phenolic acids	Phenolic acids	-	2	9	9	9	9	9	9	9	9	9	22646.5	16475.8	14088.6	9	9	9	9	9	9	11149.6	13551.1	16546.5	-	-
MWSmce083	207.07	133.03	208.074	C11H12O4	[M-H]-	Ferulic acid methyl ester	Phenolic acids	Phenolic acids	2309-07-1	3	9	9	9	9	9	9	9	9	9	12082.3	9527.82	14629.3	9	9	9	9	9	9	11061.6	8272.23	9426.28	-	-
Hmmn002544	355.1	193.05	356.111	C16H20O9	[M-H]-	Ferulic acid-4-O-glucoside	Phenolic acids	Phenolic acids	117405-51-3	2	9	9	9	9	9	9	9	9	9	845869	681789	763776	9	9	9	9	9	9	751035	661424	640530	-	-
pmb2928	331.07	313.06	332.074	C13H16O10	[M-H]-	Gallic acid-4-O-glucoside	Phenolic acids	Phenolic acids	84274-52-2	3	9	9	9	9	9	9	9	9	9	29876.7	22978.4	31896.5	9	9	9	9	9	9	28316.8	22595.7	28364.7	-	-
Hmtn001302	299.08	137.02	300.084	C13H16O8	[M-H]-	Glucosyloxybenzoic acid	Phenolic acids	Phenolic acids	-	2	9	9	9	9	9	9	9	9	9	4.11357e+06	5.94928e+06	4.61101e+06	9	9	9	9	9	9	5.97215e+06	4.54424e+06	5.39629e+06	-	-
MWSslk110	285.1	123.04	284.09	C13H16O7	[M+H]+	Helecin	Phenolic acids	Phenolic acids	618-65-5	2	9	9	9	9	9	9	9	9	9	342074	427863	328394	9	9	9	9	9	9	343561	319638	297634	-	-
mws0532	717.15	519.09	718.153	C36H30O16	[M-H]-	Lithospermic acid B	Phenolic acids	Phenolic acids	121521-90-2	3	9	9	9	9	9	9	9	9	9	71357.2	58029.7	59817.2	9	9	9	9	9	9	73387	53643.4	58054.3	-	-
Lmfn001258	467.08	169.01	468.09	C20H20O13	[M-H]-	Maplexin D (2,4-Di-O-Galloyl-1,5-Anhydro-D-Glucitol)	Phenolic acids	Phenolic acids	1355573-86-2	2	9	9	9	9	9	9	9	9	9	250396	247571	208956	9	9	9	9	9	9	246362	163474	254623	-	-
Wmyn000216	345.08	169.01	346.09	C14H18O10	[M-H]-	methyl 6-O-galloyl-β-D-gluco-pyranosid	Phenolic acids	Phenolic acids	-	2	9	9	9	9	9	9	9	9	9	42068.9	39948.4	47172.9	9	9	9	9	9	9	30695.2	38569.6	29676	-	-
Lmqp008175	163.08	103.05	162.068	C10H10O2	[M+H]+	Methyl Cinnamate	Phenolic acids	Phenolic acids	103-26-4	3	9	9	9	9	9	9	9	9	9	51852.7	67927.7	94816.2	9	9	9	9	9	9	43522.4	51498	49835.1	C06358	-
Lmyn002788	183.03	124.02	184.037	C8H8O5	[M-H]-	Methyl gallate	Phenolic acids	Phenolic acids	99-24-1	3	9	9	9	9	9	9	9	9	9	621541	746362	727855	9	9	9	9	9	9	652684	611548	861013	-	-
pme0282	165.02	77.04	166.027	C8H6O4	[M-H]-	Phthalic acid	Phenolic acids	Phenolic acids	88-99-3	3	9	9	9	9	9	9	9	9	9	32136.6	21247.2	29725	9	9	9	9	9	9	28192.2	32547.3	22254.5	C01606	ko01100,ko02010
pmp001285	149.02	65.04	148.016	C8H4O3	[M+H]+	Phthalic anhydride	Phenolic acids	Phenolic acids	85-44-9	2	9	9	9	9	9	9	9	9	9	1.20946e+06	1.18432e+06	1.42885e+06	9	9	9	9	9	9	1.30232e+06	1.23764e+06	1.37777e+06	-	-
Zmtn001661	315.11	153.02	316.116	C14H20O8	[M-H]-	Vanilloloside	Phenolic acids	Phenolic acids	74950-96-2	2	9	9	9	9	9	9	9	9	9	1.33077e+06	1.40292e+06	1.38686e+06	9	9	9	9	9	9	1.19316e+06	1.0764e+06	903299	-	-
Lafp004533	457.21	209.15	456.199	C22H32O10	[M+H]+	(6R,9R)-3-Oxo-α-ionol-β-D-malonyl-glucoside	Terpenoids	Sesquiterpenoids	-	3	9	9	9	9	9	9	9	9	9	129661	172720	199237	9	9	9	9	9	9	133306	165974	157437	-	-
Lhnp102928	541.19	137.06	540.184	C25H32O13	[M+H]+	10-Hydroxyligustroside	Terpenoids	Monoterpenoids	-	3	9	9	9	9	9	9	9	9	9	82535.9	70558.5	68837.7	9	9	9	9	9	9	51724.8	75906.2	85950	-	-
zjmp120216	471.34	435.33	470.34	C30H46O4	[M+H]+	11-Hydroxy-3-oxours-12-en-28-oic acid	Terpenoids	Triterpene	-	2	9	9	9	9	9	9	9	9	9	19064.1	21783.7	17561.8	9	9	9	9	9	9	22634.1	20448.8	20787.6	-	-
Lhnp111726	251.13	163.11	250.12	C14H18O4	[M+H]+	13-Nor-desacylcynaropicrin	Terpenoids	Sesquiterpenoids	-	3	9	9	9	9	9	9	9	9	9	99601.4	130265	120534	9	9	9	9	9	9	138680	141039	140608	-	-
pmn001427	471.35	471.24	472.355	C30H48O4	[M-H]-	16,23:16,30-Diepoxydammar-24-ene-3,20-diol (Jujubogenin)	Terpenoids	Triterpene	54815-36-0	2	9	9	9	9	9	9	9	9	9	2.56583e+06	2.51961e+06	2.34763e+06	9	9	9	9	9	9	2.95111e+06	2.52709e+06	2.29304e+06	-	-
Lskp211486	487.34	405.32	486.334	C30H46O5	[M+H]+	2,19-Dihydroxy-3-oxo-24-norolean-12-en-28-oic acid	Terpenoids	Triterpene	-	1	9	9	9	9	9	9	9	9	9	177525	236735	222486	9	9	9	9	9	9	208443	214403	215202	-	-
Lskp211481	681.38	437.31	680.377	C36H56O12	[M+H]+	2,3,19,23-Tetrahydroxy-11-oxo-olean-12-en-28-oic acid-28-glucoside	Terpenoids	Triterpene Saponin	-	2	9	9	9	9	9	9	9	9	9	25863.2	20781.9	20243.8	9	9	9	9	9	9	28953.6	24103.2	26238.8	-	-
Lskp211458	519.33	455.32	518.324	C30H46O7	[M+H]+	2,3,19,23-Tetrahydroxy-24-oxo-olean-12-en-28-oic acid	Terpenoids	Triterpene	-	2	9	9	9	9	9	9	9	9	9	45395.2	42281.4	46007.2	9	9	9	9	9	9	36787	36083.9	37610.6	-	-
Lskp211450	505.35	423.33	504.345	C30H48O6	[M+H]+	2,3,19,23-Tetrahydroxyolean-12-en-28-oic acid (Arjungenin)	Terpenoids	Triterpene	-	2	9	9	9	9	9	9	9	9	9	30465.1	29363.8	28696.4	9	9	9	9	9	9	27725.7	30522.6	26267.8	-	-
Lskp211472	503.34	457.33	502.329	C30H46O6	[M+H]+	2,3,19-Trihydroxy-24-oxo-olean-12-en-28-oic acid	Terpenoids	Triterpene	-	1	9	9	9	9	9	9	9	9	9	965656	1.01381e+06	1.03804e+06	9	9	9	9	9	9	837262	943007	986214	-	-
Lskp211457	519.33	455.32	518.324	C30H46O7	[M+H]+	2,3,19-Trihydroxyolean-12-ene-24,28-dioic acid (Bartogenic acid)	Terpenoids	Triterpene	-	1	9	9	9	9	9	9	9	9	9	3.56389e+06	3.02488e+06	3.42587e+06	9	9	9	9	9	9	3.52182e+06	3.58277e+06	3.21668e+06	-	-
Lmsn008212	517.32	471.31	518.324	C30H46O7	[M-H]-	2,3,19-Trihydroxyurs-12-en-23,28-dioic acid	Terpenoids	Triterpene	-	1	9	9	9	9	9	9	9	9	9	15181.1	22516.7	19089.2	9	9	9	9	9	9	16017.4	16255.7	17540.9	-	-
MWSCX013	489.35	201.16	488.35	C30H48O5	[M+H]+	2,3,19-trihydroxyurs-12-en-28-oic acid (Euscaphic acid)	Terpenoids	Triterpene	53155-25-2	2	9	9	9	9	9	9	9	9	9	128963	112644	162379	9	9	9	9	9	9	134476	172157	136420	C17890	-
MWSmce394	487.34	469.33	488.35	C30H48O5	[M-H]-	2,3,19-Trihydroxyurs-12-en-28-oic acid (Tormentic acid)	Terpenoids	Triterpene	13850-16-3	1	9	9	9	9	9	9	9	9	9	1.66444e+06	1.69166e+06	1.62437e+06	9	9	9	9	9	9	1.68934e+06	1.6706e+06	1.58157e+06	-	-
Lskp211468	649.39	451.32	648.387	C36H56O10	[M+H]+	2,3,23-Trihydroxyolean-12,18(19)-dien-28-oic acid-glucoside	Terpenoids	Triterpene Saponin	-	2	9	9	9	9	9	9	9	9	9	83818.1	74018.8	74256.7	9	9	9	9	9	9	81751.3	78407.3	66138.2	-	-
Lskp211491	487.34	405.31	486.334	C30H46O5	[M+H]+	2,3,23-Trihydroxyurs-12,19(29)-dien-28-oic acid	Terpenoids	Triterpene	-	2	9	9	9	9	9	9	9	9	9	235944	238600	285442	9	9	9	9	9	9	251731	247316	238014	-	-
Lskp211490	487.34	441.34	486.334	C30H46O5	[M+H]+	2,3,23-Trihydroxyurs-12,19-dien-28-oic acid	Terpenoids	Triterpene	-	2	9	9	9	9	9	9	9	9	9	170364	142178	139768	9	9	9	9	9	9	146165	145429	141120	-	-
pmp000444	487.34	469.33	486.334	C30H46O5	[M+H]+	27,28-Dicarboxyl ursolic acid	Terpenoids	Triterpene	-	2	9	9	9	9	9	9	9	9	9	29523.1	28862.6	34738.6	9	9	9	9	9	9	24812.9	33378.4	32145.6	-	-
Lmzn006582	469.34	469.34	470.34	C30H46O4	[M-H]-	2-Formyl-3-hydroxy-A(1)-norlup-20(29)-en-28-oic acid (Colubrinic acid)	Terpenoids	Triterpene	-	3	9	9	9	9	9	9	9	9	9	17854	15720.2	22579.9	9	9	9	9	9	9	20038	22560	16581.5	-	-
pmp000266	473.36	207.17	472.355	C30H48O4	[M+H]+	3,19-Dihydroxyolean-12-en-28-oic acid	Terpenoids	Triterpene	-	3	9	9	9	9	9	9	9	9	9	10374.7	9685.06	10625.2	9	9	9	9	9	9	10724.1	10224.9	9787.99	-	-
Lmzn006169	471.35	471.35	472.355	C30H48O4	[M-H]-	3,19-Dihydroxyurs-12-en-28-oic acid (Pomolic acid)	Terpenoids	Triterpene	13849-91-7	1	9	9	9	9	9	9	9	9	9	3.74253e+06	3.88464e+06	3.8584e+06	9	9	9	9	9	9	4.23596e+06	4.22707e+06	3.70332e+06	-	-
Lskp211434	665.39	503.34	664.382	C36H56O11	[M+H]+	3,23-Dihydroxy-24-oxo-olean-12-en-28-oic acid-28-O-glucoside	Terpenoids	Triterpene Saponin	-	1	9	9	9	9	9	9	9	9	9	2.41709e+06	1.92339e+06	2.50588e+06	9	9	9	9	9	9	1.91953e+06	1.761e+06	1.68169e+06	-	-
zjmp120215	471.34	435.32	470.34	C30H46O4	[M+H]+	3,25-Epoxy-3-hydroxyurs-12-en-28-oic acid (Lantic acid)	Terpenoids	Triterpene	-	2	9	9	9	9	9	9	9	9	9	214860	212920	185676	9	9	9	9	9	9	230651	190010	246693	-	-
HX1191	471.35	407.33	470.34	C30H46O4	[M+H]+	3,4-Secodammara-4(28),20,24-trien-3,26-dioic acid	Terpenoids	Triterpene	-	1	9	9	9	9	9	9	9	9	9	491797	556292	536027	9	9	9	9	9	9	498768	537563	458711	-	-
Lskp211494	457.37	203.18	456.36	C30H48O3	[M+H]+	3,9-Dihydroxy-7-oxolup-20(30)-ene	Terpenoids	Triterpene	-	2	9	9	9	9	9	9	9	9	9	88286.4	86371.3	92981.9	9	9	9	9	9	9	86389.1	97432.8	85269.4	-	-
Lmqp013490	457.37	203.18	456.36	C30H48O3	[M+H]+	3-Hydroxyolean-12-en-24-oic acid (α-Boswellic acid)	Terpenoids	Triterpene	471-66-9	2	9	9	9	9	9	9	9	9	9	5668.65	6728.5	5946.44	9	9	9	9	9	9	6598.89	5346.94	6696.45	-	-
Lmsp102910	487.34	423.32	486.334	C30H46O5	[M+H]+	3-Hydroxyolean-12-ene-27,28-dioic acid (Cincholic acid)	Terpenoids	Triterpene	5948-32-3	2	9	9	9	9	9	9	9	9	9	209567	226043	204532	9	9	9	9	9	9	192779	190005	197525	-	-
Zjmp102708	487.34	451.32	486.334	C30H46O5	[M+H]+	3-Hydroxyolean-12-ene-28,29-dioic acid (Serratagenic Acid)	Terpenoids	Triterpene	6488-64-8	2	9	9	9	9	9	9	9	9	9	37799.9	47488	44577.4	9	9	9	9	9	9	58778.3	57724.2	56469.2	-	-
Yshs000048	471.34	407.33	470.34	C30H46O4	[M+H]+	6-Hydroxy-lupane-20(29)-en-3-one-28-oic acid	Terpenoids	Triterpene	-	2	9	9	9	9	9	9	9	9	9	57403.6	64578.1	60374.3	9	9	9	9	9	9	55621.6	53318.4	56920.8	-	-
Qmyp101114	371.21	209.15	370.199	C19H30O7	[M+H]+	9-O-β-D-Glucoside of 3-hydroxy-7,8-didehydro-β-ionol	Terpenoids	Sesquiterpenoids	-	3	9	9	9	9	9	9	9	9	9	77604.6	170770	138894	9	9	9	9	9	9	114284	149972	125164	-	-
Lmsn010659	485.33	439.32	486.334	C30H46O5	[M-H]-	Annurcoic acid	Terpenoids	Triterpene	877995-09-0	3	9	9	9	9	9	9	9	9	9	32678	39665.5	37810.2	9	9	9	9	9	9	41208.6	37482.7	34845.7	-	-
Wbmn009160	487.34	487.34	488.35	C30H48O5	[M-H]-	Cannabifolin C	Terpenoids	Triterpene	-	1	9	9	9	9	9	9	9	9	9	552150	581773	575789	9	9	9	9	9	9	526215	537107	517771	-	-
Lhlp120627	195.14	67.05	194.131	C12H18O2	[M+H]+	Carvylacetate	Terpenoids	Monoterpenoids	97-42-7	3	9	9	9	9	9	9	9	9	9	332532	287806	293298	9	9	9	9	9	9	290051	337475	341083	-	-
Lmqp003013	387.2	149.1	386.194	C19H30O8	[M+H]+	Citroside A	Terpenoids	Terpene	120330-44-1	1	9	9	9	9	9	9	9	9	9	46173.6	52878.2	27530.3	9	9	9	9	9	9	32553.4	27863.4	24065	-	-
Zbzn011671	471.35	471.35	472.355	C30H48O4	[M-H]-	Cordianal C	Terpenoids	Triterpene	-	1	9	9	9	9	9	9	9	9	9	3.75763e+06	5.8336e+06	3.9871e+06	9	9	9	9	9	9	6.76793e+06	5.95675e+06	5.78615e+06	-	-
Zjjp092609	295.23	151.11	294.219	C18H30O3	[M+H]+	Dendronobilin I	Terpenoids	Sesquiterpenoids	-	3	9	9	9	9	9	9	9	9	9	333817	344042	341576	9	9	9	9	9	9	277363	301277	308020	-	-
Lafp004753	415.23	253.18	414.225	C21H34O8	[M+H]+	Eudesman-8β,12-olide-1-O-β-D-glucoside	Terpenoids	Sesquiterpenoids	-	3	9	9	9	9	9	9	9	9	9	349346	417881	307035	9	9	9	9	9	9	330296	351516	313174	-	-
mws1565	389.14	209.08	388.137	C17H24O10	[M+H]+	Geniposide	Terpenoids	Monoterpenoids	24512-63-8	3	9	9	9	9	9	9	9	9	9	26652.7	44843.5	24669.2	9	9	9	9	9	9	18041.1	28013.6	27222.1	C09781	-
Qmyp101406	309.21	119.09	308.199	C18H28O4	[M+H]+	JiangxiBaiyingsu H	Terpenoids	Sesquiterpenoids	-	3	9	9	9	9	9	9	9	9	9	66485.9	75772.4	65215	9	9	9	9	9	9	57112.5	65993.2	59056.4	-	-
Qmyp101334	293.21	151.11	292.204	C18H28O3	[M+H]+	JiangxiBaiyingsu I	Terpenoids	Sesquiterpenoids	-	3	9	9	9	9	9	9	9	9	9	32542.6	32411.4	33609.1	9	9	9	9	9	9	35385.4	30148.4	30130.8	-	-
Wbmn003185	221.16	221.15	222.162	C14H22O2	[M-H]-	Kobusone	Terpenoids	Sesquiterpenoids	24173-71-5	3	9	9	9	9	9	9	9	9	9	611827	644460	568807	9	9	9	9	9	9	665228	641705	631859	-	-
Qmqp102515	247.13	187.11	246.126	C15H18O3	[M+H]+	Leucodin	Terpenoids	Sesquiterpenoids	17946-87-1	3	9	9	9	9	9	9	9	9	9	1.01307e+06	1.04209e+06	975285	9	9	9	9	9	9	977962	964164	915611	-	-
Lmwp102906	471.2	425.2	470.194	C26H30O8	[M+H]+	Limonin	Terpenoids	Triterpene	1180-71-8	2	9	9	9	9	9	9	9	9	9	69692.8	87039.5	86115.3	9	9	9	9	9	9	75296.8	57122.2	70294.3	C03514	-
Ljmp121502	265.14	121.06	264.136	C15H20O4	[M+H]+	Mansonone Q	Terpenoids	Sesquiterpenoids	-	3	9	9	9	9	9	9	9	9	9	62347.7	78968.8	81502.5	9	9	9	9	9	9	65468.8	63408.5	79540.4	-	-
Lmyp006119	425.38	217.19	424.37	C30H48O	[M+H]+	Olean-12-en-3-one (β-Amyrone)	Terpenoids	Triterpene	638-97-1	3	9	9	9	9	9	9	9	9	9	42080.5	50123.3	57080.3	9	9	9	9	9	9	45285.7	38027.7	48646.4	-	-
Hmln008119	197.12	153.12	198.126	C11H18O3	[M-H]-	Robinlin	Terpenoids	Terpene	-	1	9	9	9	9	9	9	9	9	9	27603.5	23295.5	27901.9	9	9	9	9	9	9	22622.6	24011.8	22317	-	-
Zbqn010247	457.37	457.37	458.376	C30H50O3	[M-H]-	Rubiatriol	Terpenoids	Triterpene	107694-02-0	2	9	9	9	9	9	9	9	9	9	40629.4	50376.9	52661.1	9	9	9	9	9	9	85474	58844.6	42945.1	-	-
pmp001089	487.2	161.1	486.189	C26H30O9	[M+H]+	Rutaevin	Terpenoids	Terpene	33237-37-5	3	9	9	9	9	9	9	9	9	9	115190	115489	136695	9	9	9	9	9	9	113042	131261	100838	C08779	-
Hmmp006650	605.4	437.34	604.398	C35H56O8	[M+H]+	Saponin A	Terpenoids	Triterpene Saponin	-	1	9	9	9	9	9	9	9	9	9	21572.9	18050.9	15190.9	9	9	9	9	9	9	21238.4	14843.4	18776.4	-	-
Lkmp122404	427.2	247.13	426.189	C21H30O9	[M+H]+	Sonchuside E	Terpenoids	Sesquiterpenoids	-	3	9	9	9	9	9	9	9	9	9	81105.1	75767.8	103579	9	9	9	9	9	9	68631.3	71678.8	70518.9	-	-
MWSslk218	679.37	455.32	680.377	C36H56O12	[M-H]-	Tenuifolin	Terpenoids	Triterpene Saponin	20183-47-5	2	9	9	9	9	9	9	9	9	9	202413	179179	193739	9	9	9	9	9	9	236742	194230	205536	-	-
Ymjm000098	487.34	441.34	486.334	C30H46O5	[M+H]+	Viburolide	Terpenoids	Triterpene	-	1	9	9	9	9	9	9	9	9	9	199085	212067	196815	9	9	9	9	9	9	165605	164091	183449	-	-
Lmcn009122	253.22	235.21	254.225	C16H30O2	[M-H]-	(7Z)-Hexadecenoic acid	Lipids	Free fatty acids	2416-19-5	1	9	9	9	9	9	9	9	9	9	14807.8	21162.3	12660.6	9	9	9	9	9	9	10158.4	19184.2	20541.1	-	-
Zmyn004676	293.21	113.1	294.219	C18H30O3	[M-H]-	17-Hydroxylinolenic acid	Lipids	Free fatty acids	-	2	9	9	9	9	9	9	9	9	9	291584	299195	291705	9	9	9	9	9	9	306553	305185	276811	C16346	ko00592
Lmqn008288	299.26	299.26	300.266	C18H36O3	[M-H]-	3-Hydroxyoctadecanoic Acid	Lipids	Free fatty acids	45261-96-9	2	9	9	9	9	9	9	9	9	9	86070.1	96326.8	92872.8	9	9	9	9	9	9	92395.9	87440.7	80868.1	-	-
Lmbn004685	311.22	223.17	312.23	C18H32O4	[M-H]-	5S,8R-DiHODE; (5S,8R,9Z,12Z)-5,8-Dihydroxyoctadeca-9,12-dienoate	Lipids	Free fatty acids	-	2	9	9	9	9	9	9	9	9	9	271604	286116	272539	9	9	9	9	9	9	289452	269475	426528	C20186	ko00591
Hmqn003054	329.23	311.22	330.241	C18H34O5	[M-H]-	9,10,11-Trihydroxy-12-octadecenoic acid	Lipids	Free fatty acids	61911-67-9	2	9	9	9	9	9	9	9	9	9	452477	425555	413355	9	9	9	9	9	9	390609	382408	376232	-	-
mws0120	258.11	104.11	257.103	C8H20NO6P	[M+H]+	Choline Alfoscerate	Lipids	PC	28319-77-9	1	9	9	9	9	9	9	9	9	9	1.28742e+07	1.26897e+07	1.30943e+07	9	9	9	9	9	9	1.39186e+07	1.37367e+07	1.32788e+07	C00670	ko00564,ko00565
MWS4295	299.26	253.25	300.266	C18H36O3	[M-H]-	DL-2-hydroxystearic acid	Lipids	Free fatty acids	629-22-1	2	9	9	9	9	9	9	9	9	9	28111	33978.2	26011.7	9	9	9	9	9	9	41965.2	39690.4	30795.6	-	-
Lmyn005812	675.36	397.14	676.367	C33H56O14	[M-H]-	Gingerglycolipid A	Lipids	Glycerol ester	145937-22-0	2	9	9	9	9	9	9	9	9	9	69760.1	70904.2	66206.8	9	9	9	9	9	9	97051.9	85490	68260.9	-	-
Lmyn006011	677.38	397.13	678.383	C33H58O14	[M-H]-	Gingerglycolipid B	Lipids	Glycerol ester	88168-90-5	1	9	9	9	9	9	9	9	9	9	70554.6	71444.4	66829.5	9	9	9	9	9	9	104472	95278.9	64341.6	-	-
Lmyn006221	679.39	397.13	680.398	C33H60O14	[M-H]-	Gingerglycolipid C	Lipids	Glycerol ester	-	2	9	9	9	9	9	9	9	9	9	2564.91	2559.17	2106.65	9	9	9	9	9	9	4385.85	3368.5	2347.91	-	-
Lmhp007840	534.36	184.07	533.348	C27H52NO7P	[M+H]+	LysoPC 19:2	Lipids	LPC	-	2	9	9	9	9	9	9	9	9	9	122202	69643.8	209106	9	9	9	9	9	9	191565	114673	140439	-	-
Lmhp007598	534.36	184.07	533.348	C27H52NO7P	[M+H]+	LysoPC 19:2(2n isomer)	Lipids	LPC	-	2	9	9	9	9	9	9	9	9	9	66777.1	147436	63060.2	9	9	9	9	9	9	58648.6	54298	64807.6	-	-
Hmqn004825	293.21	275.2	294.219	C18H30O3	[M-H]-	Rabdosia acid A	Lipids	Free fatty acids	-	2	9	9	9	9	9	9	9	9	9	106311	108083	114692	9	9	9	9	9	9	112900	105715	100258	-	-
MWSmce692	277.22	59.01	278.225	C18H30O2	[M-H]-	γ-Linolenic Acid	Lipids	Free fatty acids	506-26-3	1	9	9	9	9	9	9	9	9	9	187502	213401	194855	9	9	9	9	9	9	210255	209852	195584	C06426	ko00591,ko01040,ko01100
MWS04528	168.03	56.05	167.025	C4H9NO4S	[M+H]+	(2s)-2-Amino-4-sulfinobutanoic acid	Amino acids and derivatives	Amino acids and derivatives	2686-70-6	3	9	9	9	9	9	9	9	9	9	68159.5	52521	69906.5	9	9	9	9	9	9	48883.5	45457.2	46659.6	-	-
MWS1039a	104.07	57.03	103.063	C4H9NO2	[M+H]+	(S)-3-Amino-2-methylpropanoic acid	Amino acids and derivatives	Amino acids and derivatives	4249-19-8	3	9	9	9	9	9	9	9	9	9	34520.7	25497.3	58986.9	9	9	9	9	9	9	16456.6	27139.2	21544.3	C03284	ko00280,ko01100
Lmbn000121	113.04	96.01	114.043	C4H6N2O2	[M-H]-	3-Cyano-L-alanine	Amino acids and derivatives	Amino acids and derivatives	6232-19-5	3	9	9	9	9	9	9	9	9	9	33100.8	26276.2	28673.8	9	9	9	9	9	9	32696.8	19225.8	20415.1	C02512	ko00460,ko01100,ko01110
MWS04555g	132.1	86.1	131.095	C6H13NO2	[M+H]+	D-Allo-Isoleucine	Amino acids and derivatives	Amino acids and derivatives	1509-35-9	3	9	9	9	9	9	9	9	9	9	7.01773e+06	8.9647e+06	8.74572e+06	9	9	9	9	9	9	1.98737e+07	1.87266e+07	1.83388e+07	-	-
MWS1926	132.1	86.1	131.095	C6H13NO2	[M+H]+	DL-Leucine	Amino acids and derivatives	Amino acids and derivatives	328-39-2	2	9	9	9	9	9	9	9	9	9	1.5096e+07	2.71726e+07	1.66897e+07	9	9	9	9	9	9	1.1595e+07	2.10231e+07	2.26607e+07	-	-
mws0224	150.06	61.01	149.051	C5H11NO2S	[M+H]+	DL-Methionine	Amino acids and derivatives	Amino acids and derivatives	59-51-8	3	9	9	9	9	9	9	9	9	9	1.26712e+07	1.25281e+07	1.32143e+07	9	9	9	9	9	9	1.30364e+07	1.251e+07	1.16418e+07	-	-
MWS4296	223.11	120.08	222.1	C11H14N2O3	[M+H]+	Glycylphenylalanine	Amino acids and derivatives	Amino acids and derivatives	3321-03-7	1	9	9	9	9	9	9	9	9	9	1.43586e+06	1.44432e+06	1.42019e+06	9	9	9	9	9	9	1.56897e+06	1.41673e+06	1.36231e+06	-	-
MWS201434	269.16	156.08	268.154	C12H20N4O3	[M+H]+	Ile-His	Amino acids and derivatives	Amino acids and derivatives	97284-12-3	2	9	9	9	9	9	9	9	9	9	113857	101547	105646	9	9	9	9	9	9	104398	108295	87460.3	-	-
pme0124	173.09	116.07	172.085	C7H12N2O3	[M+H]+	L-Glycyl-L-proline	Amino acids and derivatives	Amino acids and derivatives	704-15-4	3	9	9	9	9	9	9	9	9	9	1.0258e+06	1.00807e+06	911729	9	9	9	9	9	9	952292	913213	966500	-	-
pme1419	164.07	104.07	163.067	C6H13NO2S	[M+H]+	L-Methionine methyl ester	Amino acids and derivatives	Amino acids and derivatives	10332-17-9	3	9	9	9	9	9	9	9	9	9	62751.5	61605.2	61908.1	9	9	9	9	9	9	58617.3	64682.3	58782.3	-	-
pme0006	116.07	70.07	115.063	C5H9NO2	[M+H]+	L-Proline	Amino acids and derivatives	Amino acids and derivatives	147-85-3	1	9	9	9	9	9	9	9	9	9	1.25288e+06	1.59645e+06	1.20213e+06	9	9	9	9	9	9	1.83178e+06	1.55512e+06	1.17168e+06	C00148	ko00330,ko00332,ko00470,ko00970,ko01100,ko01110,ko01230,ko02010
Lmhp001461	229.15	70.07	228.147	C11H20N2O3	[M+H]+	L-Prolyl-L-Leucine	Amino acids and derivatives	Amino acids and derivatives	52899-07-7	2	9	9	9	9	9	9	9	9	9	1.87316e+06	1.85993e+06	1.95222e+06	9	9	9	9	9	9	1.69652e+06	1.71118e+06	1.66148e+06	-	-
MWS20627g	181.1	136.08	180.09	C9H12N2O2	[M+H]+	L-Tyrosinamide	Amino acids and derivatives	Amino acids and derivatives	4985-46-0	3	9	9	9	9	9	9	9	9	9	31107	25540.5	23899.4	9	9	9	9	9	9	29576.3	29484	27461.8	-	-
MWS201421	297.13	104.06	296.119	C14H20N2O3S	[M+H]+	Met-Phe	Amino acids and derivatives	Amino acids and derivatives	14492-14-9	2	9	9	9	9	9	9	9	9	9	83548.6	97872	67591.1	9	9	9	9	9	9	75445.4	59241.3	53341.7	-	-
MWS201430	251.11	104.05	250.099	C9H18N2O4S	[M+H]+	Met-Thr	Amino acids and derivatives	Amino acids and derivatives	40883-16-7	2	9	9	9	9	9	9	9	9	9	57468.4	59436.9	74239.6	9	9	9	9	9	9	73560.2	66424.2	60518.6	-	-
MWSslk120	208.1	120.08	207.089	C11H13NO3	[M+H]+	N-Acetyl-DL-phenylalanine	Amino acids and derivatives	Amino acids and derivatives	2901-75-9	3	9	9	9	9	9	9	9	9	9	486184	494711	515341	9	9	9	9	9	9	397236	435434	492770	-	-
pme1313	237.09	192.07	236.08	C11H12N2O4	[M+H]+	N'-Formylkynurenine	Amino acids and derivatives	Amino acids and derivatives	1022-31-7	3	9	9	9	9	9	9	9	9	9	20416.4	39082.4	34543.3	9	9	9	9	9	9	30668.9	27353.4	24345	C02700	ko00380,ko01100,ko01240
MWS201447	237.12	120.09	236.116	C12H16N2O3	[M+H]+	Phe-Ala	Amino acids and derivatives	Amino acids and derivatives	3918-87-4	3	9	9	9	9	9	9	9	9	9	34633.4	40401.7	28172.9	9	9	9	9	9	9	55381.4	31910.4	54254.6	-	-
pme1286	385.13	250	384.122	C14H20N6O5S	[M+H]+	S-(5'-Adenosy)-L-homocysteine	Amino acids and derivatives	Amino acids and derivatives	979-92-0	1	9	9	9	9	9	9	9	9	9	155202	196753	165746	9	9	9	9	9	9	141097	125659	140165	C00021	ko00270,ko01100,ko01230,ko01240
MWS201381	292.13	188.07	291.122	C14H17N3O4	[M+H]+	Ser-Trp	Amino acids and derivatives	Amino acids and derivatives	94421-70-2	2	9	9	9	9	9	9	9	9	9	311776	327899	255113	9	9	9	9	9	9	296047	296632	307555	-	-
mws0216	132.07	86.06	131.058	C5H9NO3	[M+H]+	Trans-4-Hydroxy-L-proline	Amino acids and derivatives	Amino acids and derivatives	51-35-4	2	9	9	9	9	9	9	9	9	9	2.56809e+07	2.54151e+07	2.51862e+07	9	9	9	9	9	9	2.99584e+07	2.85153e+07	2.79711e+07	C01157	ko00330,ko00470,ko01100,ko02010
MWS201480	253.12	136.08	252.111	C12H16N2O4	[M+H]+	Tyr-Ala	Amino acids and derivatives	Amino acids and derivatives	730-08-5	2	9	9	9	9	9	9	9	9	9	46375.6	58230.5	47858.3	9	9	9	9	9	9	52288.9	49394.7	43888.6	-	-
Zmdp001647	247.13	184.1	246.122	C10H18N2O5	[M+H]+	γ-Glutamyl-L-valine	Amino acids and derivatives	Amino acids and derivatives	-	1	9	9	9	9	9	9	9	9	9	240638	262497	251256	9	9	9	9	9	9	222086	249103	229624	-	-
Zmdn001564	293.11	164.07	294.122	C14H18N2O5	[M-H]-	γ-Glutamylphenylalanine	Amino acids and derivatives	Amino acids and derivatives	7432-24-8	1	9	9	9	9	9	9	9	9	9	46058.5	61479.6	70178.7	9	9	9	9	9	9	53040.5	52204.1	41756.8	-	-
pme2776	253.09	137.05	252.086	C10H12N4O4	[M+H]+	2'-Deoxyinosine	Nucleotides and derivatives	Nucleotides and derivatives	890-38-0	3	9	9	9	9	9	9	9	9	9	426992	450355	423222	9	9	9	9	9	9	453341	415879	441580	C05512	ko00230,ko01100,ko01232,ko02010
pme3968	166.07	149.05	165.065	C6H7N5O	[M+H]+	7-Methylguanine	Nucleotides and derivatives	Nucleotides and derivatives	578-76-7	3	9	9	9	9	9	9	9	9	9	23403.3	19805.1	18335.7	9	9	9	9	9	9	12355.5	16390.8	26899	C02242	-
MWS4354	282.12	150.08	281.112	C11H15N5O4	[M+H]+	N6-methyladenosine	Nucleotides and derivatives	Nucleotides and derivatives	1867-73-8	3	9	9	9	9	9	9	9	9	9	176762	188126	172231	9	9	9	9	9	9	150636	160435	150102	-	-
pmf0289	336.17	148.06	335.159	C15H21N5O4	[M+H]+	Riboprine	Nucleotides and derivatives	Nucleotides and derivatives	7724-76-7	3	9	9	9	9	9	9	9	9	9	10605.2	13836	11242.5	9	9	9	9	9	9	8731.03	11617.7	12960.9	C16427	ko00908,ko01110
HX1369	361.16	189.09	360.157	C20H24O6	[M+H]+	(-)-Lariciresinol	Lignans and Coumarins	Lignans	-	3	9	9	9	9	9	9	9	9	9	285625	242729	243564	9	9	9	9	9	9	190188	223493	235890	-	-
HX1231	357.17	135.04	356.162	C21H24O5	[M+H]+	(-)-Saururin	Lignans and Coumarins	Lignans	-	3	9	9	9	9	9	9	9	9	9	22415.8	22908	23140.4	9	9	9	9	9	9	16015.3	16984.5	16032	-	-
Zbyn004323	575.1	423.09	576.11	C26H24O15	[M-H]-	2,6-di-O-galloylarbutin	Lignans and Coumarins	Coumarins	-	2	9	9	9	9	9	9	9	9	9	69853.4	72450	85196.3	9	9	9	9	9	9	94726.3	115034	108335	-	-
Lahp004442	273.07	153.02	272.068	C15H12O5	[M+H]+	3,4-Dihydro-4-(4'-hydroxyphenyl)-5,7-dihydroxycoumarin	Lignans and Coumarins	Coumarins	-	2	9	9	9	9	9	9	9	9	9	84695.8	72757.9	83871.3	9	9	9	9	9	9	77915.4	77784.5	81100.1	-	-
Lasp006411	387.11	191.07	386.1	C20H18O8	[M+H]+	5'-Demethylaquillochin	Lignans and Coumarins	Lignans	305364-91-4	2	9	9	9	9	9	9	9	9	9	203806	240573	204482	9	9	9	9	9	9	190329	175541	216387	-	-
Qmzp101908	391.17	149.02	390.168	C21H26O7	[M+H]+	5'-Methoxylariciresinol	Lignans and Coumarins	Lignans	105256-12-0	3	9	9	9	9	9	9	9	9	9	212265	124061	155426	9	9	9	9	9	9	137362	149845	151273	-	-
HX1341	163.04	89.04	162.032	C9H6O3	[M+H]+	7-hydroxy-2H-1-benzopyran-2-one	Lignans and Coumarins	Coumarins	-	2	9	9	9	9	9	9	9	9	9	2.05721e+06	1.84739e+06	1.70736e+06	9	9	9	9	9	9	1.86507e+06	1.82292e+06	1.782e+06	-	-
Lcrn000334	341.14	311.09	342.147	C20H22O5	[M+H]+	austrobailignan-7	Lignans and Coumarins	Lignans	-	2	9	9	9	9	9	9	9	9	9	37664.4	41433.4	35306.8	9	9	9	9	9	9	33615.8	34952	35995	-	-
Lssp210086	373.13	137.06	372.121	C20H20O7	[M+H]+	Balanophonin B	Lignans and Coumarins	Lignans	92216-41-6	2	9	9	9	9	9	9	9	9	9	149907	146264	162372	9	9	9	9	9	9	158194	164969	136818	-	-
Sazp004372	371.15	167.07	370.142	C21H22O6	[M+H]+	Bursehernin	Lignans and Coumarins	Lignans	-	3	9	9	9	9	9	9	9	9	9	30896	28155.5	35449.5	9	9	9	9	9	9	26553.1	39943.8	17808.5	-	-
HX1376	245.09	159.09	244.074	C14H12O4	[M+H]+	clematichinenol	Lignans and Coumarins	Coumarins	-	2	9	9	9	9	9	9	9	9	9	7.97942e+06	7.93063e+06	7.58262e+06	9	9	9	9	9	9	7.09406e+06	7.22541e+06	7.23599e+06	-	-
Lcgn000241	521.2	491.19	522.21	C26H34O11	[M-H]-	dihydrodehydro-diconiferyl alcohol	Lignans and Coumarins	Lignans	-	3	9	9	9	9	9	9	9	9	9	363320	320447	417719	9	9	9	9	9	9	318935	295937	338166	-	-
Cmsp005051	523.23	137.06	522.21	C26H34O11	[M+H]+	Isolariciresinol-9-O-glucoside	Lignans and Coumarins	Lignans	-	3	9	9	9	9	9	9	9	9	9	82964.6	75618.4	96609.3	9	9	9	9	9	9	86738.7	89390	91654.2	-	-
Wagp009968	395.11	365.06	394.105	C22H18O7	[M+H]+	Justicidin A	Lignans and Coumarins	Lignans	25001-57-4	1	9	9	9	9	9	9	9	9	9	13069.7	7598.65	5314.4	9	9	9	9	9	9	7984.14	8573.99	9252.38	C10633	-
Wagp010109	395.11	365.07	394.105	C22H18O7	[M+H]+	Justicidin C	Lignans and Coumarins	Lignans	17803-12-2	2	9	9	9	9	9	9	9	9	9	13226.5	9491.16	6883.07	9	9	9	9	9	9	7633.41	9280.19	6436.93	-	-
Jmzn003343	521.2	329.14	522.21	C26H34O11	[M-H]-	Saikolignanoside A	Lignans and Coumarins	Lignans	-	1	9	9	9	9	9	9	9	9	9	298282	317839	323637	9	9	9	9	9	9	320421	285426	311723	-	-
Zmcp102703	521.2	131.05	520.194	C26H32O11	[M+H]+	saikolignanoside D	Lignans and Coumarins	Lignans	-	1	9	9	9	9	9	9	9	9	9	6.05351e+06	5.4971e+06	5.95433e+06	9	9	9	9	9	9	6.88524e+06	5.78996e+06	6.42116e+06	-	-
Wmhp000055	169.05	65.04	168.042	C8H8O4	[M+H]+	2,5-Dimethoxybenzoquinone	Quinones	Quinones	3117-03-1	1	9	9	9	9	9	9	9	9	9	1.99334e+06	2.27877e+06	1.87534e+06	9	9	9	9	9	9	2.35333e+06	2.1875e+06	2.12126e+06	-	-
Zmsp001834	169.05	65	168.042	C8H8O4	[M+H]+	2,6-Dimethoxy-1,4-benzoquinone	Quinones	Quinones	530-55-2	1	9	9	9	9	9	9	9	9	9	1.88142e+06	1.94434e+06	1.77932e+06	9	9	9	9	9	9	1.91196e+06	1.90828e+06	1.90117e+06	C10331	-
MWS20166	237.06	209.06	238.063	C15H10O3	[M-H]-	2-hydroxy-3-methyl-anthraquinone	Quinones	Anthraquinone	-	2	9	9	9	9	9	9	9	9	9	3665.71	4194.56	5299.02	9	9	9	9	9	9	3768.58	4696.83	3887.72	-	-
Zbzp007301	293.21	55.05	292.204	C18H28O3	[M+H]+	2-Methoxy-6-undecyl-1,4-benzoquinone	Quinones	Quinones	-	1	9	9	9	9	9	9	9	9	9	255651	255076	252620	9	9	9	9	9	9	232773	230433	223708	-	-
Zmdn005930	457.11	253.05	458.121	C23H22O10	[M-H]-	Chrysophanol-1-O-(6'-acetyl)-glucoside	Quinones	Anthraquinone	-	2	9	9	9	9	9	9	9	9	9	4524.98	4940.96	6991.57	9	9	9	9	9	9	4548.19	5522.61	4899.19	-	-
Zbzn008048	293.18	221.15	294.183	C17H26O4	[M-H]-	Embelin	Quinones	Quinones	550-24-3	1	9	9	9	9	9	9	9	9	9	678940	659216	638475	9	9	9	9	9	9	548197	515155	490319	-	-
Zmhn001905	447.09	285.04	448.101	C21H20O11	[M-H]-	HydroxyAloe-emodin-8-O-glucoside	Quinones	Anthraquinone	-	3	9	9	9	9	9	9	9	9	9	365963	368232	385320	9	9	9	9	9	9	315801	290768	305153	-	-
Lhfp112901	175.04	147.05	174.032	C10H6O3	[M+H]+	Juglone; 5-Hydroxy-1,4-naphthoquinone	Quinones	Quinones	481-39-0	3	9	9	9	9	9	9	9	9	9	187560	143640	113289	9	9	9	9	9	9	153163	145151	112813	C03840	-
Zmhp003112	611.16	287.06	610.153	C27H30O16	[M+H]+	safflor yellow A	Quinones	Quinones	-	1	9	9	9	9	9	9	9	9	9	360887	465903	424118	9	9	9	9	9	9	346873	380070	248872	-	-
Zmtp102902	339.11	177.05	338.1	C16H18O8	[M+H]+	α-Hydrojuglone glucoside	Quinones	Quinones	-	2	9	9	9	9	9	9	9	9	9	185214	169805	195507	9	9	9	9	9	9	226090	217366	137676	-	-
pmb3101	175.06	115.04	176.069	C7H12O5	[M-H]-	2-Isopropylmalic Acid	Organic acids	Organic acids	49601-06-1	1	9	9	9	9	9	9	9	9	9	2.79391e+06	2.80051e+06	3.51336e+06	9	9	9	9	9	9	2.3449e+06	2.15342e+06	2.63841e+06	C02504	ko00290,ko00620,ko01100,ko01110,ko01210,ko01230
Lmbn001754	175.06	115.04	176.069	C7H12O5	[M-H]-	3-Isopropylmalic Acid	Organic acids	Organic acids	921-28-8	3	9	9	9	9	9	9	9	9	9	4.68694e+06	5.02357e+06	5.3672e+06	9	9	9	9	9	9	4.004e+06	3.31596e+06	3.93303e+06	C04411	ko00290,ko01100,ko01110,ko01210,ko01230
Hajp012062	279.16	149.02	278.152	C16H22O4	[M+H]+	Dibutyl phthalate	Organic acids	Organic acids	84-74-2	1	9	9	9	9	9	9	9	9	9	1.65881e+07	1.67692e+07	1.66584e+07	9	9	9	9	9	9	1.76872e+07	1.78304e+07	1.78287e+07	C14214	-
Hmcp002616	227.09	212.06	226.074	C13H10N2O2	[M+H]+	1-Methoxycarbonyl-β-carboline	Alkaloids	Plumerane	-	2	9	9	9	9	9	9	9	9	9	22256	10091.7	15325.4	9	9	9	9	9	9	18872.7	12929.8	30699.2	-	-
Zmbp002538	205.1	146.06	204.09	C11H12N2O2	[M+H]+	1-Methoxy-indole-3-acetamide	Alkaloids	Plumerane	-	1	9	9	9	9	9	9	9	9	9	909438	913088	990344	9	9	9	9	9	9	1.0428e+06	944862	773181	-	-
Wafp002988	323.16	177.06	322.153	C16H22N2O5	[M+H]+	1-O-Feruloyllysine	Alkaloids	Phenolamine	-	2	9	9	9	9	9	9	9	9	9	985129	969504	950355	9	9	9	9	9	9	936121	800838	878039	-	-
Wafp002664	293.16	147.04	292.142	C15H20N2O4	[M+H]+	1-O-p-Coumaroyllysine	Alkaloids	Phenolamine	-	2	9	9	9	9	9	9	9	9	9	816460	979523	919664	9	9	9	9	9	9	922728	887805	937640	-	-
MWStz063	170.15	152.14	169.147	C10H19NO	[M+H]+	2-Ethyl-2,6,6-trimethylpiperidin-4-one	Alkaloids	Piperidine alkaloids	133568-79-3	2	9	9	9	9	9	9	9	9	9	63907.6	75677.7	49135.1	9	9	9	9	9	9	78578.4	61910.6	60839.2	-	-
HX1338	147.06	77.04	146.048	C8H6N2O	[M+H]+	4-puinazolinone	Alkaloids	Alkaloids	-	2	9	9	9	9	9	9	9	9	9	87844.9	92901.3	84518.4	9	9	9	9	9	9	85044.4	87857.3	69918.6	-	-
pmp001198	132.1	57.03	131.095	C6H13NO2	[M+H]+	6-Deoxyfagomine	Alkaloids	Piperidine alkaloids	197449-09-5	2	9	9	9	9	9	9	9	9	9	5.02161e+06	5.48847e+06	4.81813e+06	9	9	9	9	9	9	4.01345e+06	3.98256e+06	3.6266e+06	-	-
Lhmp113002	323.18	291.15	322.168	C20H22N2O2	[M+H]+	Akuammicine	Alkaloids	Plumerane	639-43-0	2	9	9	9	9	9	9	9	9	9	207344	188258	233825	9	9	9	9	9	9	363746	297580	355113	-	-
mws1138	551.15	303.04	550.144	C24H26N2O13	[M+H]+	Betanin (Betanidin-5-O-glucoside)	Alkaloids	Plumerane	7659-95-2	3	9	9	9	9	9	9	9	9	9	148229	104163	102171	9	9	9	9	9	9	160528	168701	156187	C08540	ko00965,ko01110
pmn001497	575.35	279.2	516.335	C33H44N2O3	[M+CH3COOH-H]-	Dendrocrepine	Alkaloids	Alkaloids	51020-39-4	1	9	9	9	9	9	9	9	9	9	30675.1	23806.9	28626.9	9	9	9	9	9	9	34929.8	33406.3	23872.1	-	-
Zmbp002142	187.09	144.05	186.079	C11H10N2O	[M+H]+	Deoxyvasicinone	Alkaloids	Alkaloids	530-53-0	2	9	9	9	9	9	9	9	9	9	734806	831216	611026	9	9	9	9	9	9	563227	562486	533353	C10659	-
Zmpp001726	184.1	124.07	183.089	C9H13NO3	[M+H]+	Epinephrine	Alkaloids	Alkaloids	51-43-4	2	9	9	9	9	9	9	9	9	9	74608.5	71141	71378.7	9	9	9	9	9	9	66707.4	80597	81001	C00788	ko00350,ko01100
pmp000097	142.09	124.07	141.079	C7H11NO2	[M+H]+	Guvacoline	Alkaloids	Piperidine alkaloids	495-19-2	2	9	9	9	9	9	9	9	9	9	1.31026e+06	1.38139e+06	1.30485e+06	9	9	9	9	9	9	1.28081e+06	1.2635e+06	1.37209e+06	C16821	-
Hmcp000220	142.12	84.08	141.115	C8H15NO	[M+H]+	Isopelletierine	Alkaloids	Piperidine alkaloids	-	2	9	9	9	9	9	9	9	9	9	103828	96204.1	110488	9	9	9	9	9	9	111445	108193	108090	-	-
MWSmce349	282.28	114.09	281.272	C18H35NO	[M+H]+	Laurocapram	Alkaloids	Alkaloids	59227-89-3	1	9	9	9	9	9	9	9	9	9	57083.1	66226.8	73383.7	9	9	9	9	9	9	57146	54834	61288	-	-
Zasp102439	118.06	91.05	117.058	C8H7N	[M+H]+	m-Aminophenylacetylene	Alkaloids	Alkaloids	54060-30-9	1	9	9	9	9	9	9	9	9	9	85320	77927.7	78177.2	9	9	9	9	9	9	92226	77022.4	67149.9	-	-
pmb0508	277.17	147.04	276.159	C14H20N4O2	[M+H]+	p-Coumaroylagmatine	Alkaloids	Phenolamine	7295-86-5	3	9	9	9	9	9	9	9	9	9	64204.3	84735.7	84157.4	9	9	9	9	9	9	54893.3	49546.9	52850.5	C04498	ko00330,ko01100
Lmqp002784	138.06	77.04	137.048	C7H7NO2	[M+H]+	Salicylamide	Alkaloids	Phenolamine	65-45-2	2	9	9	9	9	9	9	9	9	9	295307	311870	241226	9	9	9	9	9	9	309397	268560	217802	-	-
Smxp006005	400.25	340.22	399.241	C24H33NO4	[M+H]+	Spiradine A	Alkaloids	Terpenoid alkaloids	-	3	9	9	9	9	9	9	9	9	9	19150.7	18193.2	12301.7	9	9	9	9	9	9	18195.2	19174.9	11809.9	C08708	-
MWSmce492	189.1	171.09	188.095	C11H12N2O	[M+H]+	Vasicine	Alkaloids	Pyrrole alkaloids	7174-27-8	2	9	9	9	9	9	9	9	9	9	258492	229448	241009	9	9	9	9	9	9	244919	217004	197830	-	-
Wbtp005759	303.05	303.05	302.043	C15H10O7	[M+H]+	1,2,5,7,8-pentahydroxy-3-methylanthracene-9,10-dione	Flavonoids	Other Flavonoids	-	1	9	9	9	9	9	9	9	9	9	1.50588e+06	1.40931e+06	1.41082e+06	9	9	9	9	9	9	1.43299e+06	1.46904e+06	1.44107e+06	-	-
Wbtn005483	333.06	165.02	334.069	C16H14O8	[M-H]-	1,3,6-trihydroxy-2,5,7-trimethoxyxanthen-9-one	Flavonoids	Other Flavonoids	-	1	9	9	9	9	9	9	9	9	9	1.03192e+06	1.06883e+06	1.112e+06	9	9	9	9	9	9	1.07153e+06	1.03092e+06	1.16498e+06	-	-
Zbdp002220	333.12	171.06	332.111	C14H20O9	[M+H]+	2,6-Dimethoxypydroquinone-1-O-glucoside	Flavonoids	Other Flavonoids	-	2	9	9	9	9	9	9	9	9	9	75700.6	73309	50316.6	9	9	9	9	9	9	53881.1	49012.3	58456.3	-	-
Lmmp004504	287.06	153.02	286.048	C15H10O6	[M+H]+	2'-Hydroxygenistein	Flavonoids	Isoflavones	1156-78-1	2	9	9	9	9	9	9	9	9	9	85847.7	94380.8	70043.7	9	9	9	9	9	9	76599.4	76757.2	85313.2	C12134	ko00943
pmp000344	271.06	243.06	270.053	C15H10O5	[M+H]+	3',4',7-Trihydroxyflavone	Flavonoids	Flavones	2150-11-0	1	9	9	9	9	9	9	9	9	9	15680.3	20089.8	25024.3	9	9	9	9	9	9	20544.6	20684.2	23731.2	-	-
Wagp009375	343.12	313.07	342.11	C19H18O6	[M+H]+	3,5,6,7-Tetramethoxyflavone	Flavonoids	Flavones	75413-07-9	1	9	9	9	9	9	9	9	9	9	94442.9	44214.1	55747.2	9	9	9	9	9	9	60301.5	57681.6	55542.8	-	-
Zmsp007375	373.13	343.08	372.121	C20H20O7	[M+H]+	3,5,7,3'4'-Pentamethoxyflavone	Flavonoids	Flavones	1247-97-8	2	9	9	9	9	9	9	9	9	9	148082	50045.3	75328.3	9	9	9	9	9	9	73019.6	81058.4	92036.4	-	-
Lmgp003335	433.11	271.06	432.106	C21H20O10	[M+H]+	4',5-Dihydroxyisoflavone-7-O-galactoside	Flavonoids	Isoflavones	-	2	9	9	9	9	9	9	9	9	9	264664	263153	385660	9	9	9	9	9	9	203923	348790	203753	-	-
Hajp008550	403.14	342.11	402.132	C21H22O8	[M+H]+	5,6,7,3',4',5'-hexamethoxyflavone	Flavonoids	Flavones	29043-07-0	2	9	9	9	9	9	9	9	9	9	69295.8	19286.5	31533.1	9	9	9	9	9	9	41518.2	38613.2	44313.3	-	-
Lmgp004829	493.13	331.08	492.127	C23H24O12	[M+H]+	5,7,4'-Trihydroxy-6,8-dimethoxyisoflavone-7-O-galactoside	Flavonoids	Isoflavones	-	2	9	9	9	9	9	9	9	9	9	247490	318316	452664	9	9	9	9	9	9	246138	238660	257548	-	-
MWSHY0128	343.12	313.08	342.11	C19H18O6	[M+H]+	5,7,8,4'-Tetramethoxyflavone	Flavonoids	Flavones	6601-66-7	2	9	9	9	9	9	9	9	9	9	77668.8	25076.5	34259.9	9	9	9	9	9	9	42831.6	42327.4	36844.6	-	-
Lmcp009530	389.12	359.08	388.116	C20H20O8	[M+H]+	5-Demethylnobiletin	Flavonoids	Flavones	2174-59-6	1	9	9	9	9	9	9	9	9	9	22159.9	15832	12063.1	9	9	9	9	9	9	13319.4	11068.8	12832.5	-	-
Wbtn006160	241.05	223.04	242.058	C14H10O4	[M-H]-	5-hydroxy-2-methoxyxanthen-9-one	Flavonoids	Other Flavonoids	141766-17-8	1	9	9	9	9	9	9	9	9	9	218531	228015	245306	9	9	9	9	9	9	160261	165760	175478	-	-
Zmhp002640	773.21	303.05	772.206	C33H40O21	[M+H]+	6-Hydroxykaempferol-3-O-Rutinoside-6-O-glucoside	Flavonoids	Flavonols	-	2	9	9	9	9	9	9	9	9	9	279993	408048	359154	9	9	9	9	9	9	373497	359434	426116	-	-
Zmhp002730	627.16	303.05	626.148	C27H30O17	[M+H]+	6-Hydroxykaempferol-6,7-O-Diglucoside	Flavonoids	Flavonols	142674-16-6	2	9	9	9	9	9	9	9	9	9	36684	66806.1	32533.8	9	9	9	9	9	9	38531.8	42270.5	32702.1	-	-
Zbdp006427	285.08	253.05	284.068	C16H12O5	[M+H]+	7,8-Dihydroxy-4'-methoxyisoflavone	Flavonoids	Other Flavonoids	-	2	9	9	9	9	9	9	9	9	9	2.07383e+06	2.08808e+06	3.5237e+06	9	9	9	9	9	9	3.40277e+06	3.50354e+06	3.54349e+06	-	-
Lmwp003442	449.11	287.06	448.101	C21H20O11	[M+H]+	Amoenin	Flavonoids	Flavonols	-	3	9	9	9	9	9	9	9	9	9	7.27399e+06	6.06591e+06	6.51935e+06	9	9	9	9	9	9	5.13643e+06	5.64566e+06	5.57555e+06	-	-
MWSHY0189	433.11	271.07	432.106	C21H20O10	[M+H]+	Apigenin-7-O-glucoside(Cosmosiin)	Flavonoids	Flavones	578-74-5	3	9	9	9	9	9	9	9	9	9	400985	365309	403284	9	9	9	9	9	9	397356	442689	419605	C04608	ko00944
MWSmce498	579.17	271.07	578.164	C27H30O14	[M+H]+	Apigenin-7-O-neohesperidoside (Rhoifolin)	Flavonoids	Flavones	17306-46-6	2	9	9	9	9	9	9	9	9	9	232822	263891	355796	9	9	9	9	9	9	229972	276680	271964	C12627	ko00944
pme0368	579.17	271.04	578.164	C27H30O14	[M+H]+	Apigenin-7-O-rutinoside (Isorhoifolin)	Flavonoids	Flavones	552-57-8	2	9	9	9	9	9	9	9	9	9	349280	398957	462871	9	9	9	9	9	9	366988	370811	361728	-	-
MWSHY0110	285.08	225.06	284.068	C16H12O5	[M+H]+	Calycosin	Flavonoids	Isoflavones	20575-57-9	2	9	9	9	9	9	9	9	9	9	1.57783e+06	1.51399e+06	1.41008e+06	9	9	9	9	9	9	1.43087e+06	1.51648e+06	1.46712e+06	C01562	ko00943,ko01110
Hajp003546	437.14	139.04	436.137	C21H24O10	[M+H]+	catechin-3-O-α-L-rhamnopyranoside	Flavonoids	Flavanols	103630-03-1	3	9	9	9	9	9	9	9	9	9	60587.1	55677.5	63823.4	9	9	9	9	9	9	56763.2	53562.1	51833.1	-	-
pme1777	611.16	287.06	611.161	C27H31O16+	[M]+	Cyanidin-3,5-O-diglucoside (Cyanin)	Flavonoids	Anthocyanidins	2611-67-8	3	9	9	9	9	9	9	9	9	9	2.26869e+07	1.92253e+07	1.99249e+07	9	9	9	9	9	9	2.11389e+07	2.17798e+07	2.05044e+07	C08639	ko00942
Lmcp004436	611.14	287.06	611.139	C30H27O14+	[M]+	Cyanidin-3-O-(6''-O-caffeoyl)glucoside	Flavonoids	Anthocyanidins	-	3	9	9	9	9	9	9	9	9	9	604941	764007	843308	9	9	9	9	9	9	840125	933063	521982	-	-
pmb0542	535.11	287.06	535.108	C24H23O14+	[M]+	Cyanidin-3-O-(6''-O-malonyl)glucoside	Flavonoids	Anthocyanidins	171828-62-9	3	9	9	9	9	9	9	9	9	9	94121.8	101818	97410	9	9	9	9	9	9	97409.3	100256	83313.7	C12643	ko00942
Zmmp002007	757.2	287.06	757.197	C36H37O18+	[M]+	Cyanidin-3-O-(6''-O-p-coumaroyl)glucoside-5-O-glucoside	Flavonoids	Anthocyanidins	-	2	9	9	9	9	9	9	9	9	9	3.85479e+07	3.74489e+07	3.67928e+07	9	9	9	9	9	9	3.59993e+07	38266395	3.66638e+07	-	-
Amsp002433	581.14	287.05	581.15	C26H29O15+	[M]+	Cyanidin-3-O-sambubioside[Cyanidin-3-O-(2''-O-xylosyl)glucoside]	Flavonoids	Anthocyanidins	63535-17-1	2	9	9	9	9	9	9	9	9	9	3.26117e+06	3.28102e+06	3.49427e+06	9	9	9	9	9	9	3.54554e+06	3.39283e+06	3.05341e+06	C20490	ko00942
Lmpp003662	611.14	303.05	611.139	C30H27O14+	[M]+	Delphinidin-3-O-(6''-O-p-coumaroyl)glucoside	Flavonoids	Anthocyanidins	-	3	9	9	9	9	9	9	9	9	9	1.14633e+06	1.40145e+06	1.31649e+06	9	9	9	9	9	9	623173	792712	918577	C16370	ko00942
Lmcp001821	465.1	303.05	465.103	C21H21O12+	[M]+	Delphinidin-3-O-galactoside	Flavonoids	Anthocyanidins	28500-00-7	2	9	9	9	9	9	9	9	9	9	2.05841e+06	2.06374e+06	1.80283e+06	9	9	9	9	9	9	2.10964e+06	1.7055e+06	1.94854e+06	-	-
pme1398	465.1	303.05	465.103	C21H21O12+	[M]+	Delphinidin-3-O-glucoside (Mirtillin)	Flavonoids	Anthocyanidins	50986-17-9	2	9	9	9	9	9	9	9	9	9	1.81084e+06	2.14895e+06	2.15395e+06	9	9	9	9	9	9	2.15119e+06	1.63824e+06	1.83286e+06	C12138	ko00942,ko01110
pmp000579	463.12	301.07	462.116	C22H22O11	[M+H]+	Diosmetin-7-O-galactoside	Flavonoids	Flavones	-	1	9	9	9	9	9	9	9	9	9	487276	552274	569833	9	9	9	9	9	9	467919	498489	496371	-	-
Zmjn003358	455.1	289.07	456.106	C23H20O10	[M-H]-	Epicatechin-3-(3''-O-methyl)gallate	Flavonoids	Flavanols	-	2	9	9	9	9	9	9	9	9	9	87401.6	99782.7	95269.8	9	9	9	9	9	9	56805.8	61127.5	69661.1	-	-
Zmdn002049	451.13	289.07	452.132	C21H24O11	[M-H]-	Epicatechin-4'-O-β-D-glucopyranoside	Flavonoids	Flavanols	-	2	9	9	9	9	9	9	9	9	9	660148	524316	640471	9	9	9	9	9	9	624659	601210	442275	-	-
Lmcn003163	579.08	289.07	580.085	C28H20O14	[M-H]-	Epitheaflavic acid-3-O-Gallate	Flavonoids	Flavanols	34218-97-8	2	9	9	9	9	9	9	9	9	9	2.97669e+06	3.20756e+06	3.0646e+06	9	9	9	9	9	9	2.2691e+06	2.41681e+06	2.84174e+06	-	-
Lmlp005572	433.11	271.06	432.106	C21H20O10	[M+H]+	Galangin-7-O-glucoside	Flavonoids	Flavones	-	2	9	9	9	9	9	9	9	9	9	267852	267143	220611	9	9	9	9	9	9	238272	164007	211416	-	-
Lmgp004731	433.11	271.06	432.106	C21H20O10	[M+H]+	Genistein-7-O-galactoside	Flavonoids	Isoflavones	-	3	9	9	9	9	9	9	9	9	9	227175	419614	346726	9	9	9	9	9	9	313988	179484	374524	-	-
Lmgp004474	579.17	271.06	578.164	C27H30O14	[M+H]+	Genistein-7-O-galactoside-rhamnose	Flavonoids	Isoflavones	-	2	9	9	9	9	9	9	9	9	9	331291	364628	390810	9	9	9	9	9	9	367042	483173	453107	-	-
Zmgn006415	321.11	306.09	322.12	C20H18O4	[M-H]-	Glabrene	Flavonoids	Other Flavonoids	60008-03-9	2	9	9	9	9	9	9	9	9	9	6017.61	4000.19	5078.68	9	9	9	9	9	9	5445.36	6561.11	4312.58	-	-
MWSHY0069	301.07	286.05	300.063	C16H12O6	[M+H]+	Hispidulin (5,7,4'-Trihydroxy-6-methoxyflavone)	Flavonoids	Flavones	1447-88-7	2	9	9	9	9	9	9	9	9	9	10773.9	10959.9	12567.6	9	9	9	9	9	9	11140.8	6805.31	7791.29	C10058	-
pmp001033	423.09	405.08	422.085	C19H18O11	[M+H]+	Isomangiferin	Flavonoids	Other Flavonoids	24699-16-9	2	9	9	9	9	9	9	9	9	9	529328	573667	547207	9	9	9	9	9	9	568568	466962	486416	C16979	-
Cmxp004977	289.07	153.02	288.063	C15H12O6	[M+H]+	Isookanin	Flavonoids	Flavanones	-	3	9	9	9	9	9	9	9	9	9	44586.8	42623.6	26484.7	9	9	9	9	9	9	50126.4	45271.4	39074.1	-	-
mws0066	315.05	151	316.058	C16H12O7	[M-H]-	Isorhamnetin; 3'-Methoxy-3,4',5,7-Tetrahydroxyflavone	Flavonoids	Flavonols	480-19-3	3	9	9	9	9	9	9	9	9	9	15068.2	11655.3	10023.9	9	9	9	9	9	9	7659.43	10486.2	10253.3	C10084	-
HJAP064	565.12	317.08	564.111	C25H24O15	[M+H]+	Isorhamnetin-3-O-(6''-malonyl)glucoside	Flavonoids	Flavonols	-	3	9	9	9	9	9	9	9	9	9	41853.2	21982.4	44617.8	9	9	9	9	9	9	30193.8	40037.7	31500.1	-	-
MWSHY0064	625.17	317.07	624.169	C28H32O16	[M+H]+	Isorhamnetin-3-O-neohesperidoside	Flavonoids	Flavonols	55033-90-4	3	9	9	9	9	9	9	9	9	9	22916	30944.7	18838.4	9	9	9	9	9	9	31240.4	49372.2	18667.1	-	-
MWSHY0165	449.14	287.1	448.137	C22H24O10	[M+H]+	Isosakuranetin-7-O-glucoside (Isosakuranin)	Flavonoids	Flavonols	491-69-0	2	9	9	9	9	9	9	9	9	9	931357	668349	916380	9	9	9	9	9	9	733691	763598	680291	-	-
pmp001076	373.13	343.08	372.121	C20H20O7	[M+H]+	Isosinensetin	Flavonoids	Flavones	17290-70-9	2	9	9	9	9	9	9	9	9	9	341338	97512.6	162007	9	9	9	9	9	9	160509	167846	177529	-	-
Lmyp004081	579.17	313.07	578.164	C27H30O14	[M+H]+	Isovitexin-2''-O-rhamnoside	Flavonoids	Flavones	-	3	9	9	9	9	9	9	9	9	9	53509.9	56664.8	28872.9	9	9	9	9	9	9	71436.5	66826.6	64819.4	-	-
Hmgp002238	493.14	331.08	492.127	C23H24O12	[M+H]+	Jaceosidin-7-O-Glucoside	Flavonoids	Flavones	25474-11-7	2	9	9	9	9	9	9	9	9	9	329564	284224	569356	9	9	9	9	9	9	286321	300779	286682	-	-
Lmyp003500	601.12	287.06	600.111	C28H24O15	[M+H]+	Kaempferol-3-O-(2''-galloyl)galactoside	Flavonoids	Flavonols	-	3	9	9	9	9	9	9	9	9	9	12276	16619.5	24483.1	9	9	9	9	9	9	26535.6	27584.8	22135.8	-	-
pmn001642	503.08	459.1	504.09	C23H20O13	[M-H]-	Kaempferol-3-O-(2''-O-acetyl)glucuronide	Flavonoids	Flavonols	-	3	9	9	9	9	9	9	9	9	9	58139.9	55009.4	50660.1	9	9	9	9	9	9	64037.9	53553.7	59871.2	-	-
Lmyp004407	595.14	287.05	594.137	C30H26O13	[M+H]+	Kaempferol-3-O-(2''-p-Coumaroyl)galactoside	Flavonoids	Flavonols	-	3	9	9	9	9	9	9	9	9	9	333073	421320	395292	9	9	9	9	9	9	346353	382838	411874	-	-
Lmyp004318	595.14	287.06	594.137	C30H26O13	[M+H]+	Kaempferol-3-O-(6''-p-Coumaroyl)galactoside	Flavonoids	Flavonols	-	2	9	9	9	9	9	9	9	9	9	363896	407717	312062	9	9	9	9	9	9	321167	337554	320843	-	-
MWSHY0161	595.14	287.06	594.137	C30H26O13	[M+H]+	Kaempferol-3-O-(6''-p-Coumaroyl)glucoside (Tiliroside)	Flavonoids	Flavonols	20316-62-5	3	9	9	9	9	9	9	9	9	9	363896	407717	312062	9	9	9	9	9	9	321167	337554	320843	C17140	-
pmn001637	417.08	285.04	418.09	C20H18O10	[M-H]-	Kaempferol-3-O-arabinoside (Juglanin)	Flavonoids	Flavonols	5041-67-8	2	9	9	9	9	9	9	9	9	9	136313	122400	152213	9	9	9	9	9	9	102638	77619.7	115393	-	-
Xmyp005599	611.16	287.06	610.153	C27H30O16	[M+H]+	Kaempferol-3-O-galactoside-4'-O-glucoside	Flavonoids	Flavonols	-	3	9	9	9	9	9	9	9	9	9	366652	340659	192335	9	9	9	9	9	9	253914	364734	240689	-	-
Lmpp003268	757.22	287.06	756.211	C33H40O20	[M+H]+	Kaempferol-3-O-rutinoside-7-O-glucoside	Flavonoids	Flavonols	34336-18-0	2	9	9	9	9	9	9	9	9	9	222093	180654	252962	9	9	9	9	9	9	250911	190548	182858	-	-
Lmyn001269	609.15	285.04	610.154	C27H30O16	[M-H]-	Kaempferol-3-O-sophoroside	Flavonoids	Flavonols	19895-95-5	3	9	9	9	9	9	9	9	9	9	147402	134703	142002	9	9	9	9	9	9	112400	110215	117082	C12634	ko00944,ko01110
Lssp210101	341.14	137.06	340.131	C20H20O5	[M+H]+	Kushenol S	Flavonoids	Other Flavonoids	254886-72-1	2	9	9	9	9	9	9	9	9	9	1.49927e+06	1.66577e+06	1.67002e+06	9	9	9	9	9	9	1.4525e+06	1.49621e+06	1.58013e+06	-	-
Hmzp004605	463.13	301.08	462.116	C22H22O11	[M+H]+	Ladanetin-6-O-β-D-glucosid	Flavonoids	Flavones	-	2	9	9	9	9	9	9	9	9	9	351506	409369	410881	9	9	9	9	9	9	397438	376578	377854	-	-
Hajp006320	287.06	153.02	286.048	C15H10O6	[M+H]+	Luteolin (5,7,3',4'-Tetrahydroxyflavone)	Flavonoids	Flavones	491-70-3	1	9	9	9	9	9	9	9	9	9	85847.7	94380.8	70043.7	9	9	9	9	9	9	76599.4	76757.2	85313.2	C01514	ko00941,ko00944,ko01100,ko01110
Hmpp003270	449.11	287.05	448.101	C21H20O11	[M+H]+	Luteolin-4'-O-glucoside	Flavonoids	Flavones	6920-38-3	1	9	9	9	9	9	9	9	9	9	9.24956e+06	9.6785e+06	1.16622e+07	9	9	9	9	9	9	8.73385e+06	1.07012e+07	1.09214e+07	-	-
pmf0516	421.08	301.05	422.085	C19H18O11	[M-H]-	Mangiferin	Flavonoids	Other Flavonoids	4773-96-0	2	9	9	9	9	9	9	9	9	9	37930.5	46259.3	46700.1	9	9	9	9	9	9	37269.8	26784.4	41664.4	C10077	-
pme3514	301.04	151	302.043	C15H10O7	[M-H]-	Morin	Flavonoids	Flavonols	480-16-0	3	9	9	9	9	9	9	9	9	9	2.42469e+06	2.57984e+06	2.54009e+06	9	9	9	9	9	9	2.65726e+06	2.25404e+06	2.31244e+06	C10105	-
Lmfn004036	433.08	300.03	434.085	C20H18O11	[M-H]-	Morin-3-O-lyxoside	Flavonoids	Flavonols	-	1	9	9	9	9	9	9	9	9	9	4.41609e+06	4.05337e+06	4.85693e+06	9	9	9	9	9	9	3.62624e+06	2.85919e+06	4.25832e+06	-	-
Lmfp004055	435.09	303.05	434.085	C20H18O11	[M+H]+	Morin-3-O-xyloside	Flavonoids	Flavonols	-	2	9	9	9	9	9	9	9	9	9	8.41797e+06	9.31064e+06	1.07854e+07	9	9	9	9	9	9	7.3701e+06	9.5954e+06	8.08865e+06	-	-
pme1793	595.17	271.06	595.166	C27H31O15+	[M]+	Pelargonidin-3,5-O-diglucoside	Flavonoids	Anthocyanidins	17334-58-6	3	9	9	9	9	9	9	9	9	9	1.08415e+07	1.07502e+07	1.05028e+07	9	9	9	9	9	9	1.13249e+07	1.06403e+07	9.74483e+06	C08725	ko00942
Amhs002696	741.225	271.061	741.224	C33H41O19+	[M]+	Pelargonidin-3-O-rutinoside-5-O-glucoside	Flavonoids	Anthocyanidins	-	2	9	9	9	9	9	9	9	9	9	5.85935e+06	5.58726e+06	5.68809e+06	9	9	9	9	9	9	5.67378e+06	5.51426e+06	5.18608e+06	-	-
pmp000530	519.19	357.13	518.179	C26H30O11	[M+H]+	Phellodendroside	Flavonoids	Flavanonols	40451-69-2	2	9	9	9	9	9	9	9	9	9	621684	563539	759212	9	9	9	9	9	9	643671	491984	561525	-	-
Zmhn001934	417.12	255.07	418.126	C21H22O9	[M-H]-	Polygonimitin B	Flavonoids	Other Flavonoids	-	2	9	9	9	9	9	9	9	9	9	8994.49	17876.7	16671.4	9	9	9	9	9	9	7915.98	11162.7	11074.1	C17809	-
MWSHY0151	319.04	273.04	318.038	C15H10O8	[M+H]+	Quercetagetin; 3,3',4',5,6,7-Hexahydroxyflavone	Flavonoids	Flavonols	90-18-6	3	9	9	9	9	9	9	9	9	9	41470.8	59295	48382.6	9	9	9	9	9	9	45538.9	44472.2	46343.5	C10122	-
HJAP061	743.2	303.05	742.196	C32H38O20	[M+H]+	Quercetin-3-O-(2''-O-arabinosyl)rutinoside	Flavonoids	Flavonols	-	3	9	9	9	9	9	9	9	9	9	1958.47	13251.4	4215.86	9	9	9	9	9	9	8656.68	6470.37	6623.25	-	-
Lmyp003873	617.11	153.02	616.106	C28H24O16	[M+H]+	Quercetin-3-O-(2''-O-galloyl)glucoside	Flavonoids	Flavonols	69624-79-9	3	9	9	9	9	9	9	9	9	9	65820.5	58096.9	48902.7	9	9	9	9	9	9	38557.8	38193.9	65530.7	-	-
Lmyp003139	617.11	153.02	616.106	C28H24O16	[M+H]+	Quercetin-3-O-(6''-O-galloyl)galactoside	Flavonoids	Flavonols	53171-28-1	3	9	9	9	9	9	9	9	9	9	44110.8	23773.4	40737.1	9	9	9	9	9	9	48539.5	41030.9	28306.6	-	-
Lssp210056	465.1	303.05	464.096	C21H20O12	[M+H]+	Quercetin3-O-galactoside	Flavonoids	Other Flavonoids	-	2	9	9	9	9	9	9	9	9	9	1.08941e+07	1.36792e+07	1.40145e+07	9	9	9	9	9	9	1.10795e+07	1.36902e+07	1.06439e+07	-	-
Lssp210058	611.16	303.06	610.153	C27H30O16	[M+H]+	Quercetin-3-O-robinobioside	Flavonoids	Flavonols	52525-35-6	1	9	9	9	9	9	9	9	9	9	720454	974452	876112	9	9	9	9	9	9	709756	882388	913125	-	-
MWSHY0067	611.16	303.05	610.153	C27H30O16	[M+H]+	Quercetin-3-O-rutinoside (Rutin)	Flavonoids	Flavonols	153-18-4	1	9	9	9	9	9	9	9	9	9	1.28363e+06	811346	1.05197e+06	9	9	9	9	9	9	856059	1.01908e+06	873076	C05625	ko00944,ko01100,ko01110
Lmjp002906	479.12	317.07	478.111	C22H22O12	[M+H]+	Rhamnetin-3-O-Glucoside	Flavonoids	Flavonols	27875-34-9	3	9	9	9	9	9	9	9	9	9	938386	891956	964352	9	9	9	9	9	9	771956	806479	823121	-	-
Smbp004322	301.07	286.05	300.063	C16H12O6	[M+H]+	Scutevulin	Flavonoids	Flavones	80713-32-2	2	9	9	9	9	9	9	9	9	9	8863.4	10824.7	12043.2	9	9	9	9	9	9	10575.4	9367.89	9980.42	-	-
MWSHY0178	373.13	312.11	372.121	C20H20O7	[M+H]+	Sinensetin (5,6,7,3',4'-pentamethoxyflavone)	Flavonoids	Flavones	2306-27-6	2	9	9	9	9	9	9	9	9	9	178707	52110.8	70783.1	9	9	9	9	9	9	86130.6	89905.3	95768.9	C10186	-
MWSslk013	463.12	301.09	462.116	C22H22O11	[M+H]+	Tectoridin	Flavonoids	Isoflavones	611-40-5	2	9	9	9	9	9	9	9	9	9	390186	495978	429115	9	9	9	9	9	9	376484	488635	436372	C10533	-
pmb0736	493.13	331.08	492.127	C23H24O12	[M+H]+	Tricin-7-O-Glucoside	Flavonoids	Flavones	32769-01-0	3	9	9	9	9	9	9	9	9	9	247490	318316	452664	9	9	9	9	9	9	246138	238660	257548	-	-
Cmyp002064	463.12	301.08	462.116	C22H22O11	[M+H]+	Yuanhuanin	Flavonoids	Flavones	83133-14-6	2	9	9	9	9	9	9	9	9	9	428236	409430	369127	9	9	9	9	9	9	357626	386816	316484	-	-
Wmmp000176	483.07	277.03	482.07	C20H18O14	[M+H]+	2,3-(s)-hexahydroxydibenzoyl glucose	Tannins	Tannin	-	2	9	9	9	9	9	9	9	9	9	1.24161e+06	1.16331e+06	1.19484e+06	9	9	9	9	9	9	1.15429e+06	1.14318e+06	1.14472e+06	-	-
pme0434	577.14	407.08	578.142	C30H26O12	[M-H]-	Procyanidin B2	Tannins	Proanthocyanidins	29106-49-8	1	9	9	9	9	9	9	9	9	9	1.42489e+07	1.39392e+07	1.70522e+07	9	9	9	9	9	9	1.45752e+07	1.29168e+07	1.47719e+07	C17639	-
Lhzp102807	471.02	407	470.012	C21H10O13	[M+H]+	Valoneaic acid dilactone	Tannins	Tannin	-	1	9	9	9	9	9	9	9	9	9	483150	492296	489444	9	9	9	9	9	9	426504	485315	461556	-	-
Lhzp102817	935.08	633.07	934.071	C41H26O26	[M+H]+	Vescalagin	Tannins	Tannin	36001-47-5	2	9	9	9	9	9	9	9	9	9	96082.1	106336	99437.7	9	9	9	9	9	9	103139	110223	121908	-	-
Wbtp003341	291.09	139.04	290.079	C15H14O6	[M+H]+	(3,5-dihydroxyphenyl)-(4-hydroxy-2,6-dimethoxyphenyl)methanone	Others	Ketone compounds	-	1	9	9	9	9	9	9	9	9	9	1.25625e+07	1.1859e+07	1.12519e+07	9	9	9	9	9	9	1.20357e+07	1.31568e+07	1.0416e+07	-	-
Lchp000221	207.06	91.05	206.058	C11H10O4	[M+H]+	(Z)-3-Ethylidene-7-hydroxy-6-methoxyphthalide	Others	Others	-	1	9	9	9	9	9	9	9	9	9	242999	241972	234105	9	9	9	9	9	9	243420	253039	202419	-	-
pmp001267	320.29	302.29	319.288	C21H37NO	[M+H]+	2-(Dodecylamino)-3-phenyl-1-propanol	Others	Alcohol compounds	-	3	9	9	9	9	9	9	9	9	9	47234.9	56142.9	54252.7	9	9	9	9	9	9	54017.8	59122.2	57966	-	-
Lmsn003367	247.02	191.03	248.032	C12H8O6	[M-H]-	3,5,9-Trihydroxy-7,8-dihydrocyclopenta[g]chromene-2,6-dione	Others	Others	-	2	9	9	9	9	9	9	9	9	9	20503.3	29390.3	24191.9	9	9	9	9	9	9	25674.5	10566.4	27896.3	-	-
MWSmce275	163.07	107.05	162.068	C10H10O2	[M+H]+	5-Hydroxy-1-tetralone	Others	Ketone compounds	28315-93-7	3	9	9	9	9	9	9	9	9	9	207391	193102	141940	9	9	9	9	9	9	162820	125887	180829	-	-
Zahn007990	197.12	153.13	198.126	C11H18O3	[M-H]-	5-hydroxy-3,4-dimeth-yl-5-pentylfuran-2(5H)-one	Others	Others	-	1	9	9	9	9	9	9	9	9	9	25253.9	30146	23625.9	9	9	9	9	9	9	25139.1	23700.1	23469.7	-	-
pmp001045	331.14	151.11	330.132	C15H22O8	[M+H]+	Bartsioside	Others	Alcohol compounds	62133-72-6	2	9	9	9	9	9	9	9	9	9	297893	457793	518423	9	9	9	9	9	9	375569	424452	331035	-	-
Lmmn004032	163.11	148.06	164.12	C11H16O	[M-H]-	Cis-Jasmone	Others	Ketone compounds	488-10-8	2	9	9	9	9	9	9	9	9	9	47835.3	68910.3	92659	9	9	9	9	9	9	50007.1	47010.2	55020.6	C08490	-
Cmyp009787	193.16	109.06	192.151	C13H20O	[M+H]+	Damascenone	Others	Ketone compounds	23726-91-2	2	9	9	9	9	9	9	9	9	9	2.92631e+06	2.92227e+06	2.7146e+06	9	9	9	9	9	9	2.7645e+06	2.66922e+06	2.75972e+06	-	-
pmf0248	403.36	373.31	402.35	C27H46O2	[M+H]+	Delta-Tocopherol	Others	Vitamin	119-13-1	3	9	9	9	9	9	9	9	9	9	91732.3	24646.3	27765	9	9	9	9	9	9	37348.4	40479.5	44499.8	C14151	ko00130,ko01100,ko01110,ko01240
pmb0786	180.09	163.06	179.079	C6H13NO5	[M+H]+	D-Glucosamine	Others	Saccharides	3416-24-8	3	9	9	9	9	9	9	9	9	9	2.0082e+06	3.04918e+06	2.76115e+06	9	9	9	9	9	9	2.51457e+06	2.77214e+06	2.45702e+06	C00329	ko00520,ko01100,ko01250
mws0866	259.02	96.97	260.03	C6H13O9P	[M-H]-	D-Glucose 6-phosphate	Others	Saccharides	56-73-5	3	9	9	9	9	9	9	9	9	9	5.1645e+06	4.31069e+06	4.65148e+06	9	9	9	9	9	9	5.64745e+06	5.61827e+06	6.1723e+06	C00092	ko00500,ko00524,ko00562,ko01100,ko01110
pmn001380	187.1	169.09	188.105	C9H16O4	[M-H]-	Eucommiol	Others	Alcohol compounds	55930-44-4	1	9	9	9	9	9	9	9	9	9	62896.2	73611.3	64165.6	9	9	9	9	9	9	47046.5	64438	55526.6	C17878	-
Wbmp003302	165.09	91.05	164.084	C10H12O2	[M+H]+	Frambinone	Others	Ketone compounds	-	2	9	9	9	9	9	9	9	9	9	617310	547208	560899	9	9	9	9	9	9	544780	528151	518040	-	-
Lmxn008846	197.12	153.13	198.126	C11H18O3	[M-H]-	Hydroxydihydrobovolide	Others	Lactones	6067-11-4	1	9	9	9	9	9	9	9	9	9	27138.1	28452.3	27113.1	9	9	9	9	9	9	24931.3	23028.5	25235.8	-	-
Zbsn004080	391.1	229.05	392.111	C19H20O9	[M-H]-	Kakispyrone	Others	Others	-	1	9	9	9	9	9	9	9	9	9	322446	328702	398460	9	9	9	9	9	9	348433	261239	377619	-	-
Zbsp003145	291.09	123.04	290.079	C15H14O6	[M+H]+	Leucopelargonidin; 3,4,5,7,4'-Pentahydroxyflavan	Others	Others	520-17-2	1	9	9	9	9	9	9	9	9	9	7.02794e+06	6.60261e+06	6.03975e+06	9	9	9	9	9	9	6.47276e+06	6.09226e+06	6.36117e+06	-	-
pmp000509	127.04	109.03	126.032	C6H6O3	[M+H]+	Maltol	Others	Ketone compounds	118-71-8	3	9	9	9	9	9	9	9	9	9	2.13247e+06	2.10168e+06	1.9674e+06	9	9	9	9	9	9	1.81744e+06	1.70644e+06	2.0747e+06	C11918	ko00523,ko01110
Hahn000968	659.19	167.04	660.205	C32H36O15	[M-H]-	picroroside B	Others	Others	-	1	9	9	9	9	9	9	9	9	9	193917	187490	219784	9	9	9	9	9	9	122015	140800	163709	-	-
pma6455	229.01	96.97	230.019	C5H11O8P	[M-H]-	Ribulose-5-phosphate	Others	Saccharides	4300-28-1	3	9	9	9	9	9	9	9	9	9	40158.9	50310.1	68336.2	9	9	9	9	9	9	70414.1	72388.5	58955.8	C00117	ko00030,ko00230,ko00440,ko00710,ko00750,ko01100,ko01110,ko01200,ko01230,ko01240
pmp000604	435.13	273.07	434.121	C21H22O10	[M+H]+	Rubrofusarin-6-O-glucoside	Others	Ketone compounds	132922-80-6	3	9	9	9	9	9	9	9	9	9	101133	122646	115512	9	9	9	9	9	9	126904	120174	137746	-	-
Hmcn000192	209.07	59.01	210.074	C7H14O7	[M-H]-	Sedoheptulose	Others	Saccharides	3019-74-7	2	9	9	9	9	9	9	9	9	9	445863	383472	515152	9	9	9	9	9	9	362704	431992	348689	C02076	ko00710,ko01100
Zmcp102201	205.09	149.02	204.079	C12H12O3	[M+H]+	Senkyunolide B	Others	Lactones	93236-67-0	1	9	9	9	9	9	9	9	9	9	1.48702e+06	1.47711e+06	1.5109e+06	9	9	9	9	9	9	1.62769e+06	1.49039e+06	1.43699e+06	C09921	-
Lmmn000214	487.17	341.11	488.174	C18H32O15	[M-H]-	Solatriose	Others	Saccharides	528-40-5	3	9	9	9	9	9	9	9	9	9	2.50396e+06	2.66702e+06	2.49661e+06	9	9	9	9	9	9	2.10831e+06	2.58435e+06	2.26412e+06	-	-
Zamn00402	179.06	59.01	180.063	C6H12O6	[M-H]-	sorbose	Others	Saccharides	-	3	9	9	9	9	9	9	9	9	9	8.67524e+06	1.04979e+07	9.26991e+06	9	9	9	9	9	9	7.89823e+06	7.36399e+06	7.51848e+06	-	-
MWS0434	287.2	269.21	288.209	C19H28O2	[M-H]-	Trans-dehydrorosinone	Others	Ketone compounds	53-43-0	2	9	9	9	9	9	9	9	9	9	59485.9	70205.7	59934.5	9	9	9	9	9	9	60928.3	57086	58119.2	-	-
mws1515	193.16	175.15	192.151	C13H20O	[M+H]+	α-Ionone	Others	Ketone compounds	127-41-3	1	9	9	9	9	9	9	9	9	9	1.52966e+06	1.56582e+06	1.48667e+06	9	9	9	9	9	9	1.32424e+06	1.37293e+06	1.37024e+06	C12286	-
Lhcp090204	193.16	109.07	192.151	C13H20O	[M+H]+	β-Ionone	Others	Ketone compounds	79-77-6	2	9	9	9	9	9	9	9	9	9	1.4869e+06	1.62542e+06	1.51641e+06	9	9	9	9	9	9	1.45258e+06	1.43635e+06	1.37206e+06	C12287	-
